1 **Hexose fluxes, mediated by vacuolar SWEET transporters, are important for xylem**  
2 **development in the inflorescence stem of *Arabidopsis thaliana*.**

3

4 Emilie Aubry<sup>1</sup>, Beate Hoffmann<sup>1</sup>, Françoise Vilaine<sup>1</sup>, Françoise Gilard<sup>2</sup>, Patrick A.W.  
5 Klemens<sup>3</sup>, Florence Guérard<sup>2</sup>, Bertrand Gakière<sup>2</sup>, H. Ekkehard Neuhaus<sup>3</sup>, Catherine Bellini<sup>1,4</sup>,  
6 Sylvie Dinant<sup>1</sup> and Rozenn Le Hir<sup>1,\*</sup>

7

8 **Affiliations**

9 <sup>1</sup> Institut Jean-Pierre Bourgin, INRAE, AgroParisTech, Université Paris-Saclay, 78000  
10 Versailles, France

11 <sup>2</sup> Plateforme Métabolisme-Métabolome, Institute of Plant Sciences Paris-Saclay IPS2, CNRS,  
12 INRAE, Univ Paris Sud, Univ Evry, Univ Paris-Diderot, Sorbonne Paris-Cité, Université Paris-  
13 Saclay, Bâtiment 360, Rue de Noetzlin, 91192 Gif sur Yvette, France

14 <sup>3</sup> Universität Kaiserslautern, Pflanzenphysiologie, Postfach 3049, D-67653 Kaiserslautern,  
15 Germany

16 <sup>4</sup> Umeå Plant Science Centre, Department of Plant Physiology, Umeå University, 90187 Umeå,  
17 Sweden

18 \* Author for correspondence

19 **Contact information:**

20 Rozenn Le Hir

21 Telephone: +33 1 30 83 30 57

22 Fax: +33 1 30 83 30 96

23 Email : [rozenn.le-hir@inrae.fr](mailto:rozenn.le-hir@inrae.fr)

24 ORCID ID: 0000-0001-6076-5863

25

26 **Running title:** Vacuolar hexose transport and xylem development

27

28 **ABSTRACT**

29

30 In higher plants, the development of the vascular system is controlled by a complex network of  
31 transcription factors. However, how nutrient availability in the vascular cells affects their  
32 development remains to be addressed. At the cellular level, cytosolic sugar availability is  
33 regulated mainly by sugar exchanges at the tonoplast through active and/or facilitated transport.  
34 In *Arabidopsis thaliana*, among the tonoplastic transporters, SWEET16 and SWEET17 have  
35 been previously localized in the vascular system. Here, using a reverse genetic approach, we  
36 propose that sugar exchanges at the tonoplast, mediated by SWEET16, are important for xylem  
37 cell division as revealed in particular by the decreased number of xylem cells in the *swt16*  
38 mutant and the expression of *SWEET16* at the procambium-xylem boundary. In addition, we  
39 demonstrate that transport of hexoses mediated by SWEET16 and/or SWEET17 is required to  
40 sustain the formation of the xylem secondary cell wall. This result is in line with a defect in the  
41 xylem cell wall composition as measured by FTIR in the *swt16swt17* double mutant and by  
42 upregulation of several genes involved in secondary cell wall synthesis. Our work therefore  
43 supports a model in which xylem development is partially dependent on the exchange of  
44 hexoses at the tonoplast of xylem-forming cells.

45

46

47

48

49 **Keywords:** Vacuole, tonoplast, sugar, transport, xylem, development, *Arabidopsis*,  
50 inflorescence stem

51

52

53

## 54 INTRODUCTION

55 The plant vasculature, composed of phloem, procambium/cambium, and xylem, is an  
56 elaborate system responsible for the transport of most biological compounds throughout the  
57 plant (Lucas et al., 2013). At the molecular level, vasculature development is governed by a  
58 complex network of transcription factors that are under the control of several signals, including  
59 hormones, peptides, and miRNAs (Fukuda and Ohashi-Ito, 2019; Smit et al., 2019). However,  
60 within this well-organized framework, a certain plasticity is required to adjust to cellular  
61 variations in terms of the availability of nutrients (i.e. sugars and amino acids).

62 Sugars, which represent the main source of energy, are required for metabolic activities,  
63 and they serve as a carbon reserve, and as intermediates for the synthesis of cell wall  
64 polysaccharides. Additionally, they have morphogenetic activity and act as primary messengers  
65 in signal transduction pathways (Sakr et al., 2018). It is therefore logical that modifications of  
66 sugar metabolism, transport or signaling can lead to multiple defects in plant growth and  
67 development (Eveland and Jackson, 2012). However, despite this central role, the role of sugar  
68 availability in the development of the vascular system in general and more specifically in  
69 heterotrophic tissues such as cambium and xylem is still elusive.

70 In these tissues, it has been suggested that lateral transport of sugars, coming from  
71 leakages from phloem sieve tubes, provides the sugars needed for vascular cell development  
72 (Minchin and McNaughton, 1987; Sibout et al., 2008; Spicer, 2014; Furze et al., 2018). Lateral  
73 transport is especially crucial for xylem secondary cell wall formation, since sugars are  
74 intermediate compounds in the synthesis of the cell wall polysaccharides which represent 80 %  
75 of the secondary cell wall (Marriott et al., 2016; Verbančič et al., 2018). The xylem tissue thus  
76 represents a strong sink for sugars that must be imported from surrounding tissues to serve as  
77 the source of carbon and energy. This is supported by the fact that perturbations in sugar  
78 transport at the plasma membrane of vascular cells, *via* SWEET or SUT transporters, affect the  
79 composition of the xylem secondary cell wall both in aspen and in Arabidopsis inflorescence  
80 stems (Mahboubi et al., 2013; Le Hir et al., 2015). Furthermore, in the Arabidopsis  
81 inflorescence stem, it has been suggested that movements of sucrose and/or hexoses towards  
82 the apoplast, mediated by SWEET11 and SWEET12, occur between the vascular parenchyma  
83 cells and the developing conducting cells to drive cell wall formation in a cell-specific manner  
84 (Dinant et al., 2019). Intercellular sugar availability seems, therefore, to play an important role  
85 in xylem development. However, the question remains open as to whether modification of sugar  
86 partitioning within the vasculature cells is also of importance.

87           The vacuole represents the main storage compartment for numerous primary and  
88 specialized metabolites including sugars (Martinoia, 2018). In tobacco leaves, up to 98% of  
89 hexoses are found in the vacuole (Heineke et al., 1994), whereas in Arabidopsis leaves, sucrose  
90 is mostly present in the cytosol and vacuoles contain half of the glucose and fructose  
91 (Weizmann et al., 2018). Sugar exchanges between the vacuole and the cytosol are therefore  
92 required for dynamic adjustment of the quantity of sugar needed for metabolic and signaling  
93 pathways. In herbaceous and ligneous plants, few sugar transporters have been functionally  
94 characterized at the tonoplast (Hedrich et al., 2015), and localization in the cells of the vascular  
95 system has been shown only for *SUC4/SUT4*, *ESL1*, *SWEET16* and *SWEET17* (Yamada et al.,  
96 2010; Payyavula et al., 2011; Chardon et al., 2013; Klemens et al., 2013). In *Populus*, sugar  
97 export mediated by the tonoplastic sucrose symporter PttSUT4 is required for carbon  
98 partitioning between the source leaves and the lateral sinks (e.g. xylem). In Arabidopsis, we  
99 previously showed that the *SWEET16* promoter is active in the xylem parenchyma cells  
100 (Klemens et al., 2013), while the *SWEET17* promoter is active in the xylem parenchyma cells  
101 and young xylem cells of the Arabidopsis inflorescence stem (Chardon et al., 2013). Moreover  
102 high levels of *SWEET17* transcripts have been measured in the inflorescence stem, compared  
103 to other organs, after 7 to 8 weeks of growth (Guo et al., 2014). *SWEET16* and *SWEET17* are  
104 therefore good candidates with which to assess whether the maintenance of sugar homeostasis  
105 between the cytosol and the vacuole influences xylem development in Arabidopsis.

106           In the present work, through a reverse genetic approach, we demonstrate that *SWEET16*  
107 and *SWEET17* have specific and overlapping roles during xylem development. In particular,  
108 we suggest that sugar exchanges across the procambium-xylem boundary mediated by  
109 *SWEET16* are important for xylem cell proliferation. By using infrared spectroscopy and gene  
110 expression analysis, we also show that both *SWEET16* and *SWEET17* are required for correct  
111 development of the secondary cell wall of xylem cells. Finally, since glucose and fructose  
112 accumulation are observed in the inflorescence stem of the double mutant, we suggest that  
113 maintenance of hexose homeostasis through the action of *SWEET16* and/or *SWEET17* is  
114 important at different stages of xylem development.

115

116

## 117 RESULTS

### 118 Radial growth of the inflorescence stem is altered in the *swt16swt17* double mutant

119 To explore to what extent mutations in *SWEET16* and/or *SWEET17* impact  
120 inflorescence stem development in Arabidopsis, we used the previously described *sweet17-1*  
121 (hereafter called *swt17*) mutant line (Chardon et al., 2013) and identified two new T-DNA  
122 insertion lines in the *SWEET16* gene. The mutants *sweet16-3* (SM\_3.1827) and *sweet16-4*  
123 (SM\_3.30075) possess an insertion in the promoter region and in the first exon of the *SWEET16*  
124 gene respectively (Supplemental Figure 1A). They were named after the previous alleles  
125 already published (Guo et al., 2014). A full-length *SWEET16* transcript was detected by RT-  
126 PCR in the *sweet16-3* allele, while no full-length transcript could be detected in the *sweet16-4*  
127 allele (Supplemental Figure 1B and 1C). The *sweet16-4* allele (hereafter called *swt16*) was  
128 therefore deemed to be a null allele. We generated the double mutant *sweet16sweet17* (hereafter  
129 called *swt16swt17*) and confirmed by RT-PCR that both genes full length were absent in this  
130 double mutant (Supplemental Figure 1C).

131 Analysis of the inflorescence stems of the *swt16*, *swt17* and *swt16swt17* mutants showed  
132 that the area of stem cross-sections was significantly smaller compared to that of the wild-type  
133 (Figure 1A and B). More precisely, the stem of all mutant lines contained less xylem tissue  
134 compared with the wild type, while only the stem of *swt16swt17* displayed significantly less  
135 phloem tissue (Figure 1C-D). Additionally, the proportion of xylem or phloem per stem was  
136 calculated (Figure 1E-F). While no change in the proportion of phloem was observed in the  
137 mutants compared to the wild type (Figure 1E), a significant reduction in the xylem proportion  
138 was observed in the double *swt16swt17* mutant (Figure 1F). Both *SWEET16* and *SWEET17* are  
139 therefore required for proper xylem development and hence for proper radial growth of the  
140 stem.

141

### 142 *SWEET16* but not *SWEET17* is required for proliferation of xylem cells

143 The phenotype of the xylem tissue was further analyzed on an independent set of plants  
144 (Figure 2). We first checked the robustness of the inflorescence stem phenotype and confirmed  
145 that the *swt16* and *swt17* single mutants and the *swt16swt17* double mutant consistently  
146 displayed a significantly thinner inflorescence stem compared to the wild type (Figure 2A). In  
147 addition, we confirmed our previous results that showed a significantly shorter inflorescence  
148 stem in the *swt17* mutant compared to the wild-type (Figure 2B) (Chardon et al., 2013).

149 Interestingly, we did not observed any alteration in the inflorescence stem height in *swt16* or  
150 *swt16swt17* compared to the wild type (Figure 2B).

151 The xylem phenotype was then studied in more detail by counting the number of xylary  
152 fibers (cells with an area of between 5-150  $\mu\text{m}^2$ ) and xylem vessels (cells with an area greater  
153 than 150  $\mu\text{m}^2$ ) as well as measuring the individual cross-sectional areas within each vascular  
154 bundle (Figure 2C-I). In the vascular bundles of the *swt16* and *swt16swt17* mutants, but not  
155 *swt17*, the area occupied by the xylem tissue was significantly smaller than in the wild type  
156 (Figure 2C). These changes could result from modification of either cell size or cell number.  
157 While no changes in the size of the xylary fibers or the xylem vessels were observed in any of  
158 the genotypes analyzed (Figure 2D-E), the total number of xylem cells per vascular bundle was  
159 significantly reduced, by about 20%, in the single mutant *swt16* and the double mutant  
160 *swt16swt17* but not in *swt17* (Figure 2F). The numbers of xylary fibers and xylem vessels per  
161 vascular bundle were significantly reduced in the stem of the *swt16* single and *swt16swt17*  
162 double mutant but not in the *swt17* mutant (Figure 2G-H). The decreased number of xylary  
163 fibers was proportional to that of xylem vessels since the vessels-to-fibers ratio was the same  
164 in the wild type and the *swt16*, *swt17* and *swt16swt17* mutant lines (Figure 2I).

165 Overall, these results show that the single *swt16* mutant and the *swt16swt17* double  
166 mutant have the same phenotype (Figure 2 and Supplemental Table 1) and suggest that the  
167 expression of *SWEET16*, but not that of *SWEET17*, is required for correct division of xylem  
168 cells.

169

## 170 ***SWEET16* and *SWEET17* are required for normal secondary cell wall composition and** 171 **development in xylem cells**

172 To explore whether modifications in the vacuolar transport of sugars impact the  
173 formation of the xylem cell wall, we first exploited the transcriptomic dataset obtained from  
174 plants overexpressing a dexamethasone (DEX)-inducible version of the *VASCULAR RELATED*  
175 *NAC-DOMAIN PROTEIN 7* (*VND7*) gene, the master secondary wall-inducing transcription  
176 factor (Li et al., 2016). These plants allow the transcriptional and metabolic changes occurring  
177 during secondary cell wall formation to be studied. From the RNA-seq dataset, we extracted  
178 information related to the expression of the family of *SWEET* genes at different time points  
179 after induction of *VND7* expression (Supplemental Figure 2). Out of the 17 *SWEET* genes  
180 identified in Arabidopsis, 7 were differentially expressed during secondary cell wall formation

181 (Supplementary Figure 2). Most interestingly, the vacuolar *SWEET2* and *SWEET17* were  
182 significantly upregulated 3 hours after DEX induction while *SWEET16* expression was  
183 upregulated 12 hours after DEX induction (Supplementary Figure 2). In contrast, the expression  
184 of genes encoding the plasma membrane localized SWEET transporters (e.g. *SWEET1*,  
185 *SWEET3*, *SWEET11* and *SWEET12*) was significantly downregulated during secondary cell  
186 wall formation (Supplementary Figure 2). Additional analysis of the dataset showed that  
187 *SWEET2* and *SWEET17* were co-regulated with genes related to cell wall synthesis (*CESA*,  
188 *SND2*, *SDN3*, *MYB46*) as well as those encoding other sugar transporters localized at the  
189 tonoplast (*ESLI*) or at the plasma membrane (*STP1*, *STP13* and *PMT4*) (Supplementary Table  
190 2). These results support the fact that sugar export from the vacuole to the cytosol is ongoing  
191 during secondary cell wall formation, most probably to provide sugars to be used as  
192 intermediates for cell wall formation.

193 To assess whether *SWEET16* and *SWEET17* are indeed functionally involved in xylem  
194 secondary cell wall formation, we performed a targeted gene expression analysis including  
195 genes that are known to be part of the transcriptional network involved in stem cell  
196 proliferation/organization (*PXY*, *WOX4*) (Etchells et al., 2013), xylem cell identity (*ATHB8*)  
197 (Smetana et al., 2019), and secondary cell wall biosynthesis in vessels/fibers (*CESA4*, *CESA7*,  
198 *CESA8*, *KNAT7*, *MYB4*, *MYB43*, *MYB46*, *MYB52*, *MYB54*, *MYB58*, *MYB63*, *MYB83*, *MYB103*,  
199 *NST1*, *VND6*, *VND7*, *SND1/NST3*, *SND3*, *VNI2* and *XND1*) (Hussey et al., 2013) (Figure 3A-  
200 I). When looking at the overall transcriptional profile of the wild type and the *swt16*, *swt17* and  
201 *swt16swt17* mutants, two clusters can be identified (Figure 3A). The first cluster contains the  
202 wild type, the *swt16* and *swt17* single mutants, whereas the second includes only the *swt16swt17*  
203 double mutant. Only a subset of genes shows significantly increased expression among the  
204 different genotypes, namely *SND3*, *MYB103*, *MYB4*, *VNI2*, *SND1*, *MYB83*, *MYB54* and *MYB46*  
205 (Figure 3A), though a tendency, albeit not significant, is observed for *MYB43* ( $P=0.053$ ) and  
206 *KNAT7* ( $P=0.091$ ) (Figure 3A). Interestingly, all these genes belong to the transcriptional  
207 network involved in secondary cell wall biosynthesis in xylem vessels and/or in xylary fibers  
208 (for review Hussey et al., 2013). A Student's *t*-test was then performed to compare each mutant  
209 line to the wild-type plants (Figure 3B-I). On average, a 2-fold increase in expression was  
210 measured for the genes *SND1*, *MYB46*, *VNI2*, *MYB83* and *MYB54* in the *swt16swt17* double  
211 mutant compared to the wild type (Figure 3B, C, D, F and G), while a similar tendency was  
212 observed for *MYB4*, *SND3* and *MYB103* expression (Figure 3E, H and I). Overall, these results

213 show that in the *swt16swt17* double mutant neither stem cell maintenance nor xylem identity  
214 genes are affected, whereas secondary cell wall biosynthesis genes are deregulated.

215 Next, we tested whether this transcriptional deregulation was accompanied by  
216 modifications in the cell wall composition. We used Fourier-transformed infrared spectroscopy  
217 (FTIR) on inflorescence stem cross-sections to analyze the xylem secondary cell wall  
218 composition as previously described in Le Hir et al. (2015) (Figure 4). The average spectra for  
219 all three mutants showed several differences compared to the wild-type spectra in fingerprint  
220 regions associated with cellulose, hemicelluloses and lignin (Figure 4A). The *t*-values, plotted  
221 against each wavenumber of the spectrum, showed that the mutant lines exhibited several  
222 significant negative and positive peaks (higher or lower absorbance than in the wild type) at  
223 wavenumbers associated with cellulosic and hemicellulosic polysaccharides (898 cm<sup>-1</sup>, 995-  
224 1120 cm<sup>-1</sup>, 1187 cm<sup>-1</sup>, 1295 cm<sup>-1</sup>, 1373 cm<sup>-1</sup>, 1401 cm<sup>-1</sup>, 1423 cm<sup>-1</sup>, 1430 cm<sup>-1</sup>, 1440 cm<sup>-1</sup>, and  
225 1485 cm<sup>-1</sup>) (Åkerholm and Salmén, 2001; Kačuráková et al., 2002; Lahlali et al., 2015) (Figure  
226 4A and B). More precisely, wavenumbers at 898 cm<sup>-1</sup>, associated with the amorphous region  
227 of cellulose (Kačuráková et al., 2002), and at 1430 cm<sup>-1</sup>, associated with crystalline cellulose  
228 (Åkerholm and Salmén, 2001), showed opposite and significant differences (Figure 4B). This  
229 suggests a potential defect in cellulose organization in the xylem secondary cell wall.  
230 Measurements of the cellulose C-O vibrations at a peak height at 1050 cm<sup>-1</sup> (Lahlali et al., 2015)  
231 further indicate modifications of the cellulose composition in the cell wall of all the mutant  
232 lines (Figure 4C).

233 The *swt16* and *swt16swt17* mutant also displayed significant variations compared to the  
234 wild type at 1740 cm<sup>-1</sup> (band specific for acetylated xylan; Gou et al. 2003) and 1369 cm<sup>-1</sup>  
235 (deformation of C-H linkages in the methyl group *O*-acetyl moieties; Mohebbi, 2008)  
236 suggesting modifications in xylan acetylation (Figure 4A and B). Furthermore, the  
237 hemicellulose peak height at 1740 cm<sup>-1</sup> (C-O and C-C bond stretching) was significantly  
238 smaller in the *swt16* mutant suggesting less acetylated xylan (Figure 3D). Although the *swt17*  
239 single mutant was not distinguishable from the wild type, the *swt16swt17* double mutant had  
240 significantly fewer acetylated xylans than the wild type and the *swt16* single mutant (Figure  
241 4D). The lignin-associated bands at 1510 cm<sup>-1</sup> (Faix, 1991), 1520 cm<sup>-1</sup> (Faix, 1991; Gou et al.,  
242 2008) and 1595 cm<sup>-1</sup> also exhibited significant differences in the single and double mutants  
243 compared to the wild type plants (Figure 4B). Measurements of the lignin peak height ratio  
244 (1510/1595 cm<sup>-1</sup>) showed that the secondary cell wall of the *swt16* single mutant contains



245 significantly more G-type lignin than that of the wild type, while only a tendency was measured  
246 in the cases of the *swt17* and the *swt16swt17* mutants (Figure 4E).

247 Overall, these results suggest that sugar export towards the cytosol mediated by  
248 SWEET16 and/or SWEET17 is required to provide the intermediates needed for the synthesis  
249 of cellulosic and hemicellulosic polysaccharides.

250

## 251 **The hexose content is modified in the inflorescence stem of the *swt16swt17* double mutant**

252 Assuming that SWEET16 and SWEET17 are sugar carriers, we wondered what would  
253 be the metabolic status of the inflorescence stem in the *swt16swt17* double mutant. We therefore  
254 used GC-MS to explore the global metabolomic profiles of the wild-type and the double  
255 *swt16swt17* mutant, identifying a total of 158 metabolites. In order to identify the subset of  
256 metabolites that best discriminate between the genotypes, we performed a sPLS-DA (Figure  
257 5A). The resulting score plot clearly allows the two genotypes to be separated by the first  
258 dimension (Figure 5A). Among the metabolites selected by the sPLS-DA analysis, a subsequent  
259 *t*-test identified nine that were significantly different between wild type and the *swt16swt17*  
260 double mutant: allothreonine, benzoic acid, citraconic acid, cysteinylglycine, fructose, fumaric  
261 acid, glucose-6-phosphate, phytol and valine (Figure 5B and Supplemental Table 3). The  
262 relative quantities of benzoic acid, citraconic acid and fumaric acid (a component of the  
263 tricarboxylic cycle) were significantly reduced in the double mutant compared to the wild type  
264 (Supplemental Figure 3A, B and F). On the other hand, significant accumulation of  
265 cysteinylglycine (an intermediate in glutathione biosynthesis;(Hasanuzzaman et al., 2017),  
266 hexoses and hexose-phosphates (e.g. glucose-6-phosphate and fructose), amino acids (e.g.  
267 allothreonine and valine) and phytol (a chlorophyll component; (Gutbrod et al., 2019) was  
268 measured in the *swt16swt17* mutant compared to the wild-type stems (Supplemental Figure 3C,  
269 D, E, G, H and I). We further quantified the soluble sugars and starch content in both genotypes  
270 by enzymatic methods. Consistent with the metabolomics results, a significant accumulation of  
271 fructose in the double mutant was confirmed (Figure 5C). In addition, the glucose content was  
272 significantly increased in the stem of the double mutant (Figure 5C), while no variation in the  
273 sucrose and starch contents was observed (Figure 5C). Interestingly, the inflorescence stem of  
274 the *swt16swt17* double mutant accumulated mostly hexoses while no significant changes in  
275 glucose or sucrose were observed in the stem of the *swt16* and *swt17* single mutants  
276 (Supplemental Figure 4A). Although it was not significant, a tendency to accumulate glucose  
277 was observed in the single mutants (Supplemental Figure 4B). A significant increase in fructose

278 content was measured only in the *swt17* mutant compared to the wild type (Supplemental Figure  
279 4C).

280

## 281 **SWEET16 and SWEET17 proteins interact physically and are expressed in the xylem** 282 **during its early development**

283 To localize SWEET16 and SWEET17 in the inflorescence stem, we generated  
284 translational fusions between GFP and the N-terminus of *SWEET16* or *SWEET17* coding  
285 sequences under the control of their native promoters. The translational fusions were transferred  
286 into the respective knockout mutants in order to check their functionalities. We then looked at  
287 the radial growth of the inflorescence stem in the transgenic plants. *pSWT17:GFP-SWT17*  
288 successfully complemented the phenotype of the *swt17* mutant (Supplemental Figure 5), while  
289 *pSWT16:GFP-SWT16* only partially complemented the stem phenotype of the *swt16* mutant  
290 (Supplementary Figure 5). However, full complementation of the double mutant *swt16swt17*  
291 was achieved when both translational GFP fusions were expressed (Supplemental Figure 5).  
292 Unfortunately, despite the phenotype complementation, we could not detect any GFP signal in  
293 these lines. Previously, using lines expressing *pSWT:GUS* translational fusions, we showed that  
294 SWEET16 and SWEET17 were expressed in the xylem tissue of petioles and inflorescence  
295 stems (Chardon et al., 2013; Klemens et al., 2013). Here we completed this analysis by studying  
296 the expression patterns of SWEET16 and SWEET17 in cross sections from three different zones  
297 of the stem: (1) a stem region where the growth was rapid, (2) a stem region where elongation  
298 growth had finished but where further thickening of the secondary cell wall was still ongoing  
299 and (3) the base of the stem, which corresponds to a mature zone (Hall and Ellis, 2013) (Figure  
300 6). Interestingly, the expression pattern of *SWEET16* and *SWEET17* varied depending on the  
301 developmental stages. The *SWEET16* expression pattern fluctuated more depending on the  
302 stage of inflorescence stem development (Figure 6A-C). In the region where the stem was  
303 growing rapidly (Figure 6A and inset) and in the region where secondary cell wall thickening  
304 was still ongoing (Figure 6B and inset), expression of *SWEET16* was observed in the  
305 interfascicular fibers, across the procambium-xylem boundary and in the young xylem vessels  
306 (Figure 6A-B and insets). Faint GUS staining was also observed in the phloem cells at these  
307 stages (Figure 6A-B). In the mature stem, *SWEET16* expression was restricted to the xylary  
308 parenchyma cells (Figure 6C). In contrast, *SWEET17* expression was restricted mostly to the  
309 xylem parenchyma cells present in the distal part of the vascular bundle (Figure 6D-F).  
310 Expression of *SWEET17* was also observed in the young xylem cells before extensive cell wall

311 lignification had occurred, as shown by the weaker phloroglucinol cell wall staining (Figure  
312 6E, 6F and inset). Here, it is worth noting that we use the general term “young xylem cells”  
313 because it is not possible to know whether the GUS signal is present in developing xylary fibers  
314 and/or in developing xylem vessels. In conclusion, *SWEET16* and *SWEET17* expression  
315 patterns overlap in the young xylem cells as well as in the xylary parenchyma cells.

316 It has been established that plant sugar SWEET transporters require homo or hetero-  
317 oligomerization to gain functionality (Xuan et al., 2013). Because *SWEET16* and *SWEET17*  
318 expression patterns overlap in young xylem cells and xylary parenchyma cells, we investigated  
319 whether these proteins could interact. Xuan et al. (2013) previously showed that SWEET16 and  
320 SWEET17 can form homodimers as well as heterodimers in a split ubiquitin yeast two-hybrid  
321 assay. We confirmed that SWEET16 and SWEET17 can form a heterodimer at the vacuolar  
322 membrane in a bimolecular fluorescence complementation assay in *Arabidopsis* mesophyll  
323 protoplasts (Figure 6G-I).

324

## 325 DISCUSSION

326 To efficiently control carbon homeostasis within a cell and to fuel the different  
327 metabolic and signaling pathways, dynamic sugar storage in the plant vacuole is critical. Over  
328 the past years, several vacuolar transporters have been identified at the molecular level (for  
329 review see Hedrich et al., 2015). Among them, SWEET16 and SWEET17 have been  
330 characterized as bidirectional tonoplastic sugar facilitators and shown to be involved in seed  
331 germination, root growth and stress tolerance (Chardon et al., 2013; Klemens et al., 2013; Guo  
332 et al., 2014). In addition, the expression of both genes has been shown in the inflorescence  
333 stem’s vascular parenchyma cells, but this had not previously been explored further. In this  
334 work, we ask whether facilitated sugar transport (*via* SWEET16 and SWEET17) across the  
335 vacuolar membrane limits vascular tissue development in the inflorescence stem of  
336 *Arabidopsis*.

337 First, our data highlight modifications of hexose homeostasis in the inflorescence stem  
338 of the different mutant lines. Although a tendency to accumulate glucose was observed in the  
339 *swt16* mutant, a significant increase in fructose was measured in the *swt17* mutant stem.  
340 Furthermore, mutations in both *SWEET16* and *SWEET17* induced somewhat specific  
341 accumulation of glucose, glucose-6-phosphate and fructose in the inflorescence stem. It has  
342 been previously shown that defects in the expression of vacuolar sugar transporters alter carbon  
343 partitioning and allocation in different organs, which is in line with our findings for the

344 inflorescence stem (Wingenter et al., 2010; Yamada et al., 2010; Poschet et al., 2011; Chardon  
345 et al., 2013; Klemens et al., 2013; Guo et al., 2014; Klemens et al., 2014). Knowing that SWEET  
346 proteins are sugar facilitators working along the concentration gradient (Chen et al., 2010) and  
347 that at least half of the hexoses are present in the plant vacuole (Heineke et al., 1994;  
348 Weiszmann et al., 2018), we can reasonably propose that some of the hexoses are trapped inside  
349 the vacuole in the single *swt16* and *swt17* mutants and the *swt16swt17* double mutant. As a  
350 consequence, modifications in the distribution of hexose concentrations between the vacuole  
351 and the cytosol, which would impact the availability of hexoses for subsequent metabolic and  
352 signaling purposes, could be expected. Hexoses are known to favor cell division and expansion,  
353 while sucrose favors differentiation and maturation (Koch, 2004). In addition, after  
354 metabolization, hexoses and hexoses-phosphates constitute the building blocks for the synthesis  
355 of cell wall polysaccharides (Verbančič et al., 2018). Since *SWEET16* and/or *SWEET17* are  
356 expressed in the xylem initials, in young xylem cells and in xylem parenchyma cells, we  
357 propose that enhanced storage of vacuolar hexoses in these cells will affect different stages of  
358 xylem development.

359 (Pro)cambium and xylem tissues can be regarded as sinks because they rely mostly on  
360 the supply of carbohydrates from the surrounding cells to sustain their development (Sibout et  
361 al., 2008; Spicer, 2014). In aspen stem, a gradual increase in sucrose and reducing sugars,  
362 together with a rise in the activities of sugar metabolism enzymes, are observed across the  
363 cambium-xylem tissues (Roach et al., 2017). In addition, in tomato, modification of fructose  
364 phosphorylation by the fructokinase SIFRK2 leads to a defect in cambium activity (Damari-  
365 Weissler et al., 2009). Taken together, these results support the need for maintenance of sugar  
366 homeostasis in the (pro)cambium to respond to the high metabolic activity required during cell  
367 division. Our work identified *SWEET16* as a player in the dividing xylem cells, acting to  
368 balance the tradeoffs between the need for sugars in the cytosol and their storage in the vacuole  
369 (Figure 7). This conclusion is supported by the fact that *SWEET16* is expressed across the  
370 procambium-xylem boundary and that a mutation in *SWEET16* leads to defects in the number  
371 of xylem cells and in radial growth of the inflorescence stem. Furthermore, the expression of  
372 the gene coding for the WUSCHEL RELATED HOMEBOX 4 (*WOX4*) transcription factor  
373 (Etchells et al., 2013), which is involved in cellular proliferation, was unchanged in both *swt16*  
374 and *swt16swt17* mutants. This suggest that the defects in xylem cell division result mostly from  
375 reduced availability of energy and matter resources due to a reduction in sugar transport, rather  
376 than from the signaling role of sugars. Finally, the partial complementation of the *swt16* mutant

377 could also suggest that other vacuolar sugar transporters, yet to be identified, might be at play  
378 in this process.

379 The reduced number of xylem vessels in the *swt16swt17* double mutant's vascular  
380 bundle could be explained by the upregulation of *VND-INTERACTING 2 (VNI2)*, which is a  
381 repressor of the activity of the master regulator of xylem vessel differentiation VND7 (Zhong  
382 et al., 2008; Yamaguchi et al., 2010). On the other hand, the overexpression in the double  
383 mutant *swt16swt17* of SECONDARY WALL-ASSOCIATED NAC DOMAIN 1 (*SND1*), the  
384 master switch for fiber differentiation, would be expected to result in a shift towards increased  
385 differentiation of xylary fibers (Zhong et al., 2006), which is not consistent with the fewer fibers  
386 observed in the double mutant. Based on these results, we can assume that the increase in  
387 storage of vacuolar hexoses in the double mutant also affects xylem cell differentiation. Against  
388 this hypothesis, our results show that both xylary fibers and xylem vessels number decreased  
389 proportionately, since no change in the xylem vessels/xylary fibers ratio was measured.  
390 Consistent with this observation, the expression of the gene coding for the PHLOEM  
391 INTERCALATED WITH XYLEM (*PXY*) receptor, which is involved in xylem cell  
392 differentiation (Etchells et al., 2016), was not modified. Despite the upregulation of *VNI2* and  
393 *SND1* expression, which could be due to a feedback mechanism yet to be identified, these  
394 results therefore tend to suggest that no disequilibrium is occurring in xylem cell differentiation  
395 in the *swt16swt17* mutant stem. The enhanced storage of hexoses in the vacuole of the double  
396 mutant is therefore affecting the overall pattern of xylem cell division rather than xylem cell  
397 differentiation.

398 After cell division and differentiation, xylem cells undergo a developmental program  
399 that includes secondary cell wall formation, lignification and programmed cell death, to produce  
400 functional xylem fibers and vessels (Schuetz et al., 2012) (Figure 7). Along with the  
401 overexpression of *SDNI*, the overexpression of genes encoding its downstream targets, namely  
402 MYB DOMAIN PROTEIN 46 and 83 (*MYB46* and *MYB83*), was observed in the *swt16swt17*  
403 double mutant. Furthermore, the targets of the *MYB46/MYB83* node, which positively  
404 regulates *SND3* (SECONDARY WALL-ASSOCIATED NAC DOMAIN PROTEIN 3),  
405 *KNAT7* (KNOTTED-LIKE HOMEBOX OF ARABIDOPSIS THALIANA 7), *MYB43* and  
406 *MYB54* or/and negatively regulates *MYB103*, *KNAT7* and *MYB4*, all of which are involved  
407 in the formation of the xylem secondary cell wall, are also upregulated (Hussey et al., 2013).  
408 *KNAT7* directly or indirectly represses cellulose, hemicellulose and lignin biosynthetic genes  
409 (*Li et al., 2012*), while *MYB54* is related to cellulose synthesis (*Zheng et al., 2019*). In

410 Arabidopsis, MYB43 along with other MYB transcription factors regulates lignin biosynthesis  
411 (Geng et al., 2020), while its ortholog in rice is involved in the regulation of cellulose deposition  
412 (Ambavaram et al., 2011). Finally, upregulation of MYB4 in Arabidopsis results in  
413 downregulation of the lignin pathway (Jin et al., 2000), while a role for MYB103 in lignin  
414 biosynthesis has been shown in Arabidopsis stem (Öhman et al., 2013). In the *swt16wt17* double  
415 mutant, these transcriptional changes were accompanied by modifications of the secondary cell  
416 wall in terms of cellulose and hemicellulose composition. However, a single mutation in  
417 *SWEET16* or *SWEET17* was sufficient to modify the composition of the xylem cell wall without  
418 any alteration in the expression of genes involved in secondary cell wall synthesis. Our data  
419 further show that the *SWEET16* and *SWEET17* expression patterns overlap in xylem cells that  
420 are building a secondary cell wall and that they form a heterodimer in Arabidopsis mesophyll  
421 protoplasts. We therefore postulate that the intermediate sugars required for the synthesis of  
422 cell wall polysaccharides come in part from the vacuole unloading mediated by SWEET16 and  
423 SWEET17 homo- and heterodimers (Figure 7). Previously, it has been shown that genes  
424 encoding vacuolar sugar facilitators are up-regulated during secondary cell wall formation in  
425 xylem vessels, while sugar facilitators expressed at the plasma membrane are down-regulated  
426 (Supplementary Figure 2) (Li et al., 2016), supporting the idea that secondary cell wall  
427 formation relies on sugar export from the vacuole. In the current model of cell wall synthesis,  
428 the cytosolic catabolism of sucrose is thought to be the main source of nucleotide sugars (e.g.  
429 UDP-glucose, UDP-galactose, GDP-mannose) that act as precursors for cellulose and  
430 hemicellulose synthesis (Verbančič et al., 2018). Our data support the existence of a more  
431 complex system in which the export of vacuolar hexoses also represents a source for the  
432 synthesis of nucleotide sugars and subsequent cell wall formation (Figure 7).

433 Because *SWEET16* and *SWEET17* are also expressed in the xylary parenchyma cells,  
434 we postulate that the maintenance of sugar homeostasis within this cell type, is important and  
435 could contribute to the provision of carbon skeletons for secondary cell wall synthesis after the  
436 disappearance of the vacuole from the maturing xylem cells (Figure 7). Within this scheme, the  
437 export of sugars in the apoplastic space between parenchyma cells and developing conducting  
438 cells could be carried out by the plasmalemmal SWEET11 and SWEET12 transporters which  
439 also expressed in the xylary parenchyma cells (Figure 7 and (Le Hir et al., 2015). Such  
440 cooperation between parenchyma cells and developing conducting cells was previously  
441 described as the “good neighbor” hypothesis in the context of H<sub>2</sub>O<sub>2</sub> and monolignol transport  
442 (Barcelo, 2005; Smith et al., 2013; Smith et al., 2017). To further explore the importance of

443 sugar transport between xylary parenchyma cells and developing xylem cells, more  
444 experiments, such as cell-specific complementation of the *sweet* mutant lines, will be needed  
445 in order to better comprehend the role of xylary parenchyma cells in xylem development.

446 In conclusion, our work shows that exchange of intracellular hexoses, mediated by  
447 SWEET16 and/or SWEET17 at the tonoplast, contributes to xylem development by regulating  
448 the amounts of sugars that will be made available to the different cellular processes. However,  
449 how the cell is prioritizing the distribution of sugars among the different processes remains an  
450 open question. Although these technologies are challenging, the use of non-aqueous  
451 fractionation and metabolomics approaches (Fürtauer et al., 2019) could help in resolving  
452 subcellular sugar metabolism in a cell-specific context in mutant lines affected in sugar  
453 metabolism, transport and signaling.

454

455

456

## 457 MATERIALS AND METHODS

### 458 *Plant material and growth conditions*

459 Seeds of T-DNA insertion lines homozygous for *SWEET17* (*sweet17-1*) and *SWEET16*  
460 (*sweet16-3* and *sweet16-4*) were gifts from Dr. F. Chardon and Pr. E. Neuhaus respectively.  
461 The *sweet17-1* line was previously reported to be a knock-out by Chardon et al. (2013). The  
462 *sweet16-3* (SM\_3\_1827) and *sweet16-4* (SM\_3\_30075) lines were numbered following the  
463 *sweet16-1* and *sweet16-2* lines already published by Guo et al. (2014). To verify whether  
464 *sweet16-3* and *sweet16-4* were knock-out mutants we performed RT-PCR with specific primers  
465 to amplify the full-length *SWEET16* cDNA (Supplemental Figure 1 and Supplemental Table  
466 4). Since only the *sweet16-4* mutant turned to be a knock-out (Supplemental Figure 1B), we  
467 crossed it with *swt17-1* to obtained the double mutant *sweet16-4sweet17-1* (hereafter referred  
468 as *swt16swt17*). Homozygous plants were genotyped using gene-specific primers in  
469 combination with a specific primer for the left border of the T-DNA insertion (Supplemental  
470 Table 4).

471 To synchronize germination, seeds were stratified at 4°C for 48 hours and sown in soil in a  
472 growth chamber in long day conditions (16 hours day/8 hours night and 150  $\mu\text{E m}^{-2} \text{s}^{-1}$ ) at  
473 22/18°C (day/night temperature) with 35% relative humidity. Plants were watered with Plant-  
474 Prod nutrient solution twice a week (Fertil, <https://www.fertil.fr/>). For all experiments, the main  
475 inflorescence stems (after removal of lateral inflorescence stems, flowers and siliques) were  
476 harvested from seven-week old plants.

477

### 478 *Inflorescence stem sample preparation*

479 For each plant, the main inflorescence stem height was measured with a ruler before harvesting  
480 a 1 to 2 cm segment taken at the bottom part of the stem. The stem segments were embedded  
481 in 8% agarose solution and sectioned with a VT100 S vibratome (Leica, [https://www.leica-](https://www.leica-microsystems.com/)  
482 [microsystems.com/](https://www.leica-microsystems.com/)). Some of the cross-sections were used for FT-IR analysis and the others  
483 were stained with a FASGA staining solution prepared as described in Tolivia and Tolivia  
484 (1987) for morphometric analysis of the xylem.

485

486



487

### 488 ***Morphometric analysis of the xylem***

489 Previously stained inflorescence stem cross-sections were imaged under an Axio Zoom V16  
490 microscope equipped with a Plan-Neofluar Z 2.3/0.57 FWD 10.6 objective (Zeiss,  
491 <https://www.zeiss.fr/microscopie/>). For each section, the diameter of the inflorescence stem  
492 was measured using the Image J software package (<https://imagej.nih.gov/ij/>). For the same  
493 sections all the vascular bundles were photographed individually using a confocal laser  
494 scanning microscope and morphological analysis of the xylem were performed as described in  
495 Le Hir et al. (2015). For each vascular bundle, the morphological segmentation made it possible  
496 to find the number of xylem cells (xylary fibers and xylem vessels) as well as their cross-  
497 sectional areas. Cells with a cross-sectional area of between 5 to 150  $\mu\text{m}^2$  were considered to  
498 be xylary fibers and cells with a cross-sectional area greater than 150  $\mu\text{m}^2$  were considered to  
499 be xylem vessels. The sum of all xylem cell cross-sectional areas was then calculated to give  
500 the total xylem cross-sectional area. The average xylary fiber and xylem vessel area was  
501 calculated by dividing the total xylem cross-sectional area by the number of each cell type.

502

### 503 ***FT-IR analysis of the xylem secondary cell wall***

504 The composition of the secondary cell wall of the xylem tissue was determined by Fourier  
505 Transformed Infra-red spectroscopy using an FT-IR Nicolet<sup>TM</sup> iN<sup>TM</sup> (Thermo Fisher Scientific,  
506 <https://www.thermofisher.com>). Spectral acquisitions were done in transmission mode on a 30  
507  $\mu\text{m}$  by 30  $\mu\text{m}$  acquisition area targeting the xylem tissue (xylem vessels and xylary fibers) as  
508 described in Le Hir et al. (2015). Between 10 to 15 acquisition points sweeping the xylem tissue  
509 homogeneously were performed on each vascular bundle within a stem section. Three  
510 individual inflorescence stems were analyzed for each genotype. After sorting the spectra and  
511 correcting the baseline, the spectra were area-normalized and the different genotypes were  
512 compared as described in Le Hir et al. (2015). The absorbance values (maximum height) of the  
513 major cellulose, lignin and hemicellulose bands in the fingerprint region (1800–800  $\text{cm}^{-1}$ ) were  
514 collected using TQ Analyst EZ edition (Thermo Fisher Scientific,  
515 <https://www.thermofisher.com>).

516

### 517 ***Metabolomic analysis***

518 The inflorescence stems of the wild-type and the *swt16swt17* double mutant were harvested in  
519 the middle of the day (8 hours after the beginning of the light period). Metabolites were  
520 extracted from 4.5 mg of lyophilized stem powder from eight individual plants and analyzed  
521 by GC-MS as described in Cañas et al. (2020). Relative concentrations of metabolites were  
522 determined relative to the internal standard ribitol, which was added after grinding the  
523 lyophilized material. Differential accumulation of metabolites was determined by one-way  
524 analysis of variance (ANOVA) and *post hoc* Tukey tests ( $P < 0.05$ ).

525

### 526 ***Quantification of soluble sugars and starch***

527 The main inflorescence stems of the wild type, and the *swt16*, *swt17* and *swt16swt17* mutants,  
528 were harvested in the middle of the day (8 hours after the beginning of the light period), frozen  
529 in liquid nitrogen and ground with a mortar and a pestle. Soluble sugars and starch were  
530 extracted from 50 mg of powder from an individual stem as described in Sellami et al. (2019).  
531 Depending on the experiment, 4 to 9 biological replicates were analyzed.

532

### 533 ***RNA isolation and cDNA synthesis***

534 RNAs were prepared from the main inflorescence stem from four 7-week-old individual plants  
535 grown as described above. Samples were frozen in liquid nitrogen before being ground with a  
536 mortar and a pestle. Powders were stored at  $-80^{\circ}\text{C}$  until use. Total RNA was extracted from  
537 frozen tissue using TRIzol® reagent (Thermo Fisher Scientific, 15595-026,  
538 <https://www.thermofisher.com>) and treated with DNase I, RNase-free (Thermo Fisher  
539 Scientific, EN0521, <https://www.thermofisher.com>). cDNA was synthesized by reverse  
540 transcribing 1  $\mu\text{g}$  of total RNA using RevertAid H minus reverse transcriptase (Thermo Fisher  
541 Scientific, EP0452, <https://www.thermofisher.com>) with 1  $\mu\text{l}$  of oligo(dT)18 primer (100  
542 pmoles) according to the manufacturer's instructions. The reaction was stopped by incubation  
543 at  $70^{\circ}\text{C}$  for 10 min.

544

### 545 ***Quantitative qPCR experiment***

546 Transcript levels were assessed for four independent biological replicates in assays with  
547 triplicate reaction mixtures by using specific primers either designed with the Primer3 software  
548 (<http://bioinfo.ut.ee/primer3-0.4.0/primer3/>) or taken from the literature (Supplemental Table

549 5). qPCR reactions were performed in a 96-well transparent plate on a Bio-Rad CFX96 Real-  
550 Time PCR machine (Bio-Rad) in 10  $\mu$ l mixtures each containing 5  $\mu$ l of Takyon™ ROX  
551 SYBR® MasterMix dTTP Blue (Eurogentec, UF-RSMT-B0710,  
552 <https://www.eurogentec.com/>), 0.3  $\mu$ l forward and reverse primer (30  $\mu$ M each), 2.2  $\mu$ l sterile  
553 water and 2.5  $\mu$ l of a 1/30 dilution of cDNA. The following qPCR program was applied: initial  
554 denaturation at 95°C for 5 min, followed by thirty-nine cycles of 95°C for 10 sec, 60°C for 20  
555 sec, 72°C for 30 sec. Melting curves were derived after each amplification by increasing the  
556 temperature in 0.5°C increments from 65°C to 95°C. The Cq values for each sample were  
557 acquired using the Bio-Rad CFX Manager 3.0 software package. The specificity of  
558 amplification was assessed for each gene, using dissociation curve analysis, by the precision of  
559 a unique dissociation peak. If one of the Cq values differed from the other two replicates by >  
560 0.5, it was removed from the analysis. The amplification efficiencies of each primer pair were  
561 calculated from a 10-fold serial dilution series of cDNA (Supplemental Table 5). Four genes  
562 were tested as potential reference genes: *APT1* (At1g27450), *TIP41* (At4g34270), *EF1 $\alpha$*   
563 (At5g60390) and *UBQ5* (At3g62250). The geNorm algorithm (Vandesompele et al., 2002) was  
564 used to determine the gene most stably expressed among the different genotypes analyzed,  
565 namely *UBQ5* in this study. The relative expression level for each genotype was calculated  
566 according to the  $\Delta$ Ct method using the following formula: average  $E_t^{-Cq(\text{of target gene in A})}/E_r^{-Cq(\text{of}$   
567  $\text{reference gene in A})}$ , where  $E_t$  is the amplification efficiency of the target gene primers,  $E_r$  is the  
568 reference gene primer efficiency, A represents one of the genotypes analyzed.

569

### 570 ***Tagged protein constructs***

571 For complementation of the single *sweet16-4* and *sweet17-1* and the double *sweet16-4swee17-*  
572 *1* mutants, N terminal fusions with GFP were constructed as follow. First, the coding sequence  
573 of eGFP was amplified from the pKGWFS7 plasmid (Karimi et al., 2002) without a stop codon  
574 and then introduced into a modified donor pENTR vector to produce pENT-GFP (w/o stop).  
575 To make the N terminal translational GFP fusions (pSWEET16:GFP-SWEET16 and  
576 pSWEET17:GFP-SWEET17), the promoters (1295 bp for *SWEET16* and 2004 bp for  
577 *SWEET17*) and genomic sequences (1863 bp for *SWEET16* and 2601 bp for *SWEET17*) were  
578 amplified separately and then cloned on each side of the GFP gene in the intermediary vector  
579 pENT-GFP (w/o stop) by taking advantage of the restriction sites generated by PCR. All the  
580 PCR reactions were performed using Phusion High-Fidelity DNA Polymerase (Thermo Fisher  
581 Scientific, F-530S, <https://www.thermofisher.com>) with the primers listed in Supplemental

582 Table 4. Donor vectors created in this way were analyzed by sequencing in order to check the  
583 reading frame of the translational fusions and the integrity of the whole genomic sequences.  
584 Destination binary vectors were then obtained by recombination, using Gateway® LR Clonase  
585 II Enzyme Mix (Thermo Fisher Scientific, 11791-100, <https://www.thermofisher.com>),  
586 between pENTR donor vectors and pMDC123 for N terminal fusions (Curtis and Grossniklaus,  
587 2003). All binary vectors were introduced into *Agrobacterium tumefaciens* C58pMP90 (Koncz  
588 and Schell, 1986) by electroporation. Arabidopsis single mutants *swt16-4* and *swt17-1* as well  
589 as the double mutant *sweet16-4sweet17-1* plants were transformed by the floral dip method  
590 (Clough and Bent, 1998). Transformants were selected on hygromycin (15 mg/L) for pMDC99  
591 constructs and/or Basta (7.5 mg/L) for pMDC123 constructs. For all constructs, three  
592 independent transgenic lines were analyzed and one representative line was selected for  
593 subsequent studies.

594 For the bimolecular fluorescence complementation (BiFC) assay, the full-length ORFs of  
595 *SWEET16* and *SWEET17* were amplified from cDNA with the primers given in Supplemental  
596 Table 4, either with or without their stop codons, depending on the final vector used. The ORFs  
597 were further sub-cloned into pBlueScript II SK, blunt end cut with EcoRV. The resulting  
598 vectors were checked for errors and orientation of the insert by sequencing with T3 and T7  
599 primers. Subsequently, positive clones in the T7 orientation and the corresponding pSAT1  
600 vectors (Lee et al., 2008) were cut with EcoRI and XhoI. *SWEET16* including the stop codon  
601 was ligated into pSAT1-cCFP-C, and *SWEET17* without the stop codon into pSAT1-nCerulean-  
602 N. Plasmid DNA of the final constructs was isolated with a PureLink™ HiPure Plasmid Filter  
603 Midiprep Kit (Invitrogen™/Thermo Fisher Scientific) according to the manufacturer's manual.  
604 Isolation and transfection of Arabidopsis mesophyll protoplasts were performed as described  
605 by Yoo et al. (2007). For imaging protoplasts, a Leica TCS SP5 II confocal laser scanning  
606 microscope (<http://www.leica-microsystems.com>) was used. All pictures were taken using a  
607 Leica HCX PL APO 63·/1.20 w motCORR CS objective with a VIS-Argon laser suitable for  
608 constructs with CFP (Cerulean, 458 nm/480-520 nm) derivatives.

609

### 610 *Statistical analysis*

611 Differences between genotypes were assessed by a Student's *t*-test for comparison between  
612 wild-type plants and mutant lines or by using one-way analysis of variance (ANOVA) with a  
613 Tukey HSD post-hoc test. The sPLS-DA analysis was performed according to Jiang et al.

614 (2014) and Lê Cao et al. (2011). Irrelevant variables were removed using lasso (least absolute  
615 shrinkage and selection operator) penalizations and 20 variables were selected in each  
616 dimension. The ‘mixOmics’ package (Rohart et al., 2017) was used to perform sPLS-DA. All  
617 the statistical analysis and graph production were done in RStudio (version 1.1.456) (Rstudio  
618 Team, 2015), which incorporates the R software package (version 3.5.1) (R Core Team, 2017)  
619 using ‘ggplot2’ (Wickham, 2016), ‘ggthemes’ (Arnold, 2019), ‘cowplot’ (Wilke, 2019),  
620 ‘hyperSpec’ (Beleites and Sergio, 2020) and ‘multcompView’(Graves et al., 2015).

621

## 622 **AUTHOR CONTRIBUTIONS**

623 Methodology, E.A., F.V. and F.Gi.; Resources, P.A.W. K., H.E.N, B.G. and F.Gu.;  
624 Investigation, E.A., B.H., F.V., P.A.W, F.G. and R.L.H.; Writing-Review & Editing, E.A., S.D.,  
625 C.B. and R.L.H.; Conceptualization, R.L.H.; Supervision, R.L.H.; Funding acquisition, R.L.H.

626

## 627 **ACKNOWLEDGMENTS**

628 The authors would like to thank Dr. Fabien Chardon and Dr. Anne Krapp (IJPB, INRAE  
629 Versailles, France) for providing seeds of the *sweet17-1* mutant. The authors also thank Dr.  
630 Grégory Mouille (IJPB, INRAE Versailles, France) for advice on FTIR dataset analysis. This  
631 work has benefited from the support of IJPB's Plant Observatory technological platforms and  
632 from a French State grant (Saclay Plant Sciences, reference ANR-17-EUR-0007, EUR SPS-  
633 GSR) managed by the French National Research Agency under an Investments for the Future  
634 program (reference ANR-11-IDEX-0003-02) through PhD funding to E.A.

635

636

637

638

639 **REFERENCES**

- 640 **Åkerholm, M., and Salmén, L.** (2001). Interactions between wood polymers studied by  
641 dynamic FT-IR spectroscopy. *Polymer (Guildf)*. **42**:963–969.
- 642 **Ambavaram, M. M. R., Krishnan, A., Trijatmiko, K. R., and Pereira, A.** (2011).  
643 Coordinated activation of cellulose and repression of lignin biosynthesis pathways in rice.  
644 *Plant Physiol*. **155**:916–931.
- 645 **Arnold, J. B.** (2019). Ggthemes: extra themes, scales and geoms for “ggplot2” Advance Access  
646 published 2019.
- 647 **Barcelo, R. A.** (2005). Xylem parenchyma cells deliver the H<sub>2</sub>O<sub>2</sub> necessary for lignification  
648 in differentiating xylem vessels. *Planta* **220**:747–756.
- 649 **Beleites, C., and Sergio, V.** (2020). hyperSpec: a package to handle hyperspectral data sets in  
650 R. *CRAN Packag*. Advance Access published 2020.
- 651 **Cañas, R. A., Yesbergenova-Cuny, Z., Belanger, L., Rouster, J., Brulé, L., Gilard, F.,**  
652 **Quilleré, I., Sallaud, C., and Hirel, B.** (2020). NADH-GOGAT overexpression does not  
653 improve maize (*Zea mays* L.) performance even when pyramiding with NAD-IDH, GDH  
654 and GS. *Plants* **9**.
- 655 **Chardon, F., Bedu, M., Calenge, F., Klemens, P. A. W., Spinner, L., Clement, G., Chietera,**  
656 **G., Léran, S., Ferrand, M., Lacombe, B., et al.** (2013). Leaf fructose content is  
657 controlled by the vacuolar transporter SWEET17 in *Arabidopsis*. *Curr. Biol*. **23**:697–702.
- 658 **Chen, L.-Q., Hou, B.-H., Lalonde, S., Takanaga, H., Hartung, M. L., Qu, X.-Q., Guo, W.-**  
659 **J., Kim, J.-G., Underwood, W., Chaudhuri, B., et al.** (2010). Sugar transporters for  
660 intercellular exchange and nutrition of pathogens. *Nature* **468**:527–532.
- 661 **Chen, L.-Q., Qu, X.-Q., Hou, B.-H., Sosso, D., Osorio, S., Fernie, A. R., and Frommer, W.**  
662 **B.** (2012). Sucrose efflux mediated by SWEET proteins as a key step for phloem transport.  
663 *Science (80-. )*. **335**:207–211.
- 664 **Clough, S. J., and Bent, A. F.** (1998). Floral dip: A simplified method for *Agrobacterium*-  
665 mediated transformation of *Arabidopsis thaliana*. *Plant J*. **16**:735–743.
- 666 **Curtis, M. D., and Grossniklaus, U.** (2003). A gateway cloning vectors set for high-  
667 throughput functional analysis of genes in planta. *Plant Physiol*. **133**:462–469.

- 668 **Damari-Weissler, H., Rachamilevitch, S., Aloni, R., German, M. A., Cohen, S.,**  
669 **Zwieniecki, M. A., Holbrook, N. M., and Granot, D.** (2009). LeFRK2 is required for  
670 phloem and xylem differentiation and the transport of both sugar and water. *Planta*  
671 **230**:795–805.
- 672 **Dinant, S., Wolff, N., De Marco, F., Vilaine, F., Gissot, L., Aubry, E., Sandt, C., Bellini,**  
673 **C., and Le Hir, R.** (2019). Synchrotron FTIR and Raman spectroscopy provide unique  
674 spectral fingerprints for *Arabidopsis* floral stem vascular tissues. *J. Exp. Bot.* **70**:871–884.
- 675 **Etchells, J. P., Provost, C. M., Mishr, L., and Turner, S. R.** (2013). WOX4 and WOX14 act  
676 downstream of the PXY receptor kinase to regulate plant vascular proliferation  
677 independently of any role in vascular organisation. *Dev.* **140**:2224–2234.
- 678 **Etchells, J. P., Smit, M. E., Gaudinier, A., Williams, C. J., and Brady, S. M.** (2016). A brief  
679 history of the TDIF-PXY signalling module: Balancing meristem identity and  
680 differentiation during vascular development. *New Phytol.* **209**:474–484.
- 681 **Eveland, A. L., and Jackson, D. P.** (2012). Sugars, signalling, and plant development. *J. Exp.*  
682 *Bot.* **63**:3367–3377.
- 683 **Faix, O.** (1991). Classification of lignins from different botanical origins by FT-IR  
684 spectroscopy. *Holzforschung-International J. Biol. Chem. Phys. Technol. Wood* **45**:21–27.
- 685 **Fukuda, H., and Ohashi-Ito, K.** (2019). *Vascular tissue development in plants*. 1st ed. Elsevier  
686 Inc.
- 687 **Fürtauer, L., Küstner, L., Weckwerth, W., Heyer, A. G., and Nägele, T.** (2019). Resolving  
688 subcellular plant metabolism. *Plant J.* Advance Access published 2019,  
689 doi:10.1111/tpj.14472.
- 690 **Furze, M. E., Trumbore, S., and Hartmann, H.** (2018). Detours on the phloem sugar  
691 highway: stem carbon storage and remobilization. *Curr. Opin. Plant Biol.* **43**:89–95.
- 692 **Geng, P., Zhang, S., Liu, J., Zhao, C., Wu, J., Cao, Y., Fu, C., Han, X., He, H., and Zhao,**  
693 **Q.** (2020). MYB20, MYB42, MYB43, and MYB85 regulate phenylalanine and lignin  
694 biosynthesis during secondary cell wall formation1[OPEN]. *Plant Physiol.* **182**:1272–  
695 1283.
- 696 **Gou, J. Y., Park, S., Yu, X. H., Miller, L. M., and Liu, C. J.** (2008). Compositional  
697 characterization and imaging of “wall-bound” acylesters of *Populus trichocarpa* reveal

- 698 differential accumulation of acyl molecules in normal and reactive woods. *Planta* **229**:15–  
699 24.
- 700 **Gould, N., Thorpe, M. R., Pritchard, J., Christeller, J. T., Williams, L. E., Roeb, G.,**  
701 **Schurr, U., and Minchin, P. E. H.** (2012). AtSUC2 has a role for sucrose retrieval along  
702 the phloem pathway: Evidence from carbon-11 tracer studies. *Plant Sci.* **188–189**:97–101.
- 703 **Graves, S., Piepho, H.-P., Selzer, L., and Dorai-Raj, S.** (2015). multcompView:  
704 Visualizations of paired comparisons Advance Access published 2015.
- 705 **Guo, W.-J., Nagy, R., Chen, H.-Y., Pfrunder, S., Yu, Y.-C., Santelia, D., Frommer, W. B.,**  
706 **and Martinoia, E.** (2014). SWEET17, a facilitative transporter, mediates fructose  
707 transport across the tonoplast of Arabidopsis roots and leaves. *Plant Physiol.* **164**:777–  
708 789.
- 709 **Gutbrod, K., Romer, J., and Dörmann, P.** (2019). Phytol metabolism in plants. *Prog. Lipid*  
710 *Res.* **74**:1–17.
- 711 **Hall, H., and Ellis, B.** (2013). Transcriptional programming during cell wall maturation in the  
712 expanding Arabidopsis stem. *BMC Plant Biol.* **13**:14.
- 713 **Hasanuzzaman, M., Nahar, K., Anee, T. I., and Fujita, M.** (2017). Glutathione in plants:  
714 biosynthesis and physiological role in environmental stress tolerance. *Physiol. Mol. Biol.*  
715 *Plants* **23**:249–268.
- 716 **Hedrich, R., Sauer, N., and Neuhaus, H. E.** (2015). Sugar transport across the plant vacuolar  
717 membrane: Nature and regulation of carrier proteins. *Curr. Opin. Plant Biol.* Advance  
718 Access published 2015, doi:10.1016/j.pbi.2015.04.008.
- 719 **Heineke, D., Wildenberger, K., Sonnewald, U., Willmitzer, L., and Heldt, H. W.** (1994).  
720 Accumulation of hexoses in leaf vacuoles: Studies with transgenic tobacco plants  
721 expressing yeast-derived invertase in the cytosol, vacuole or apoplast. *Planta* **194**:29–33.
- 722 **Hussey, S. G., Mizrachi, E., Creux, N. M., and Myburg, A. A.** (2013). Navigating the  
723 transcriptional roadmap regulating plant secondary cell wall deposition. *Front. Plant Sci.*  
724 **4**:1–21.
- 725 **Jiang, M., Wang, C., Zhang, Y., Feng, Y., Wang, Y., and Zhu, Y.** (2014). Sparse partial-  
726 least-squares discriminant analysis for different geographical origins of salvia miltiorrhiza  
727 by 1h-nmr-based metabolomics. *Phytochem. Anal.* **25**:50–58.



- 728 **Jin, H., Cominelli, E., Bailey, P., Parr, A., Mehrstens, F., Jones, J., Tonelli, C., Wiesshaar,**  
729 **B., and Martin, C.** (2000). Transcriptional repression by AtMYB4 controls production of  
730 UV-protecting sunscreens in Arabidopsis. *EMBO J.* **19**:6150–6161.
- 731 **Kačuráková, M., Smith, A. C., Gidley, M. J., and Wilson, R. H.** (2002). Molecular  
732 interactions in bacterial cellulose composites studied by 1D FT-IR and dynamic 2D FT-  
733 IR spectroscopy. *Carbohydr. Res.* **337**:1145–1153.
- 734 **Karimi, M., Inze, D., and Depicker, A.** (2002). GATEWAY(TM) vectors for  
735 Agrobacterium-mediated plant transformation. *Trends Plant Sci.* **7**:193–195.
- 736 **Klemens, P. A. W., Patzke, K., Deitmer, J., Spinner, L., Le Hir, R., Bellini, C., Bedu, M.,**  
737 **Chardon, F., Krapp, A., and Neuhaus, H. E.** (2013). Overexpression of the vacuolar  
738 sugar carrier *AtSWEET16* modifies germination, growth, and stress tolerance in  
739 Arabidopsis. *Plant Physiol.* **163**:1338–1352.
- 740 **Klemens, P. A. W., Patzke, K., Trentmann, O., Poschet, G., Büttner, M., Schulz, A.,**  
741 **Marten, I., Hedrich, R., and Neuhaus, H. E.** (2014). Overexpression of a proton-coupled  
742 vacuolar glucose exporter impairs freezing tolerance and seed germination. *New Phytol.*  
743 **202**:188–197.
- 744 **Koch, K. E.** (2004). Sucrose metabolism: regulatory mechanisms and pivotal roles in sugar  
745 sensing and plant development. *Curr. Opin. Plant Biol.* **7**:235–246.
- 746 **Koncz, C., and Schell, J.** (1986). The promoter of TL-DNA gene 5 controls the tissue-specific  
747 expression of chimaeric genes carried by a novel type of Agrobacterium binary vector.  
748 *Mol. Gen. Genet.* **204**:383–396.
- 749 **Lahlali, R., Karunakaran, C., Wang, L., Willick, I., Schmidt, M., Liu, X., Borondics, F.,**  
750 **Forseille, L., Fobert, P. R., Tanino, K., et al.** (2015). Synchrotron based phase contrast  
751 X-ray imaging combined with FTIR spectroscopy reveals structural and biomolecular  
752 differences in spikelets play a significant role in resistance to Fusarium in wheat. *BMC*  
753 *Plant Biol.* **15**.
- 754 **Lê Cao, K. A., Boitard, S., and Besse, P.** (2011). Sparse PLS discriminant analysis:  
755 Biologically relevant feature selection and graphical displays for multiclass problems.  
756 *BMC Bioinformatics* **12**.
- 757 **Le Hir, R., Spinner, L., Klemens, P. A. W., Chakraborti, D., De Marco, F., Vilaine, F.,**

- 758 **Wolff, N., Lemoine, R., Porcheron, B., Géry, C., et al.** (2015). Disruption of the Sugar  
759 Transporters AtSWEET11 and AtSWEET12 Affects Vascular Development and Freezing  
760 Tolerance in *Arabidopsis*. *Mol. Plant* **8**:1687–1690.
- 761 **Lee, L. Y., Fang, M. J., Kuang, L. Y., and Gelvin, S. B.** (2008). Vectors for multi-color  
762 bimolecular fluorescence complementation to investigate protein-protein interactions in  
763 living plant cells. *Plant Methods* **4**:1–11.
- 764 **Li, E., Bhargava, A., Qiang, W., Friedmann, M. C., Forneris, N., Savidge, R. A., Johnson,  
765 L. A., Mansfield, S. D., Ellis, B. E., and Douglas, C. J.** (2012). The Class II KNOX gene  
766 KNAT7 negatively regulates secondary wall formation in *Arabidopsis* and is functionally  
767 conserved in *Populus*. *New Phytol.* **194**:102–115.
- 768 **Li, Z., Omranian, N., Neumetzler, L., wang, ting, Herter, T., Usadel, B., Demura, T.,  
769 Giavalisco, P., Nikoloski, Z., and Persson, S.** (2016). A Transcriptional and Metabolic  
770 Framework for Secondary Wall Formation in *Arabidopsis*. *Plant Physiol.* Advance Access  
771 published 2016, doi:10.1104/pp.16.01100.
- 772 **Lucas, W. J., Groover, A., Lichtenberger, R., Furuta, K., Yadav, S. R., Helariutta, Y., He,  
773 X. Q., Fukuda, H., Kang, J., Brady, S. M., et al.** (2013). The Plant Vascular System:  
774 Evolution, Development and Functions. *J. Integr. Plant Biol.* **55**:294–388.
- 775 **Mahboubi, A., Ratke, C., Gorzsás, A., Kumar, M., Mellerowicz, E. J., and Niittylä, T.**  
776 (2013). Aspen SUCROSE TRANSPORTER3 allocates carbon into wood fibers. *Plant*  
777 *Physiol.* **163**:1729–1740.
- 778 **Marriott, P. E., Gómez, L. D., and Mcqueen-Mason, S. J.** (2016). Unlocking the potential  
779 of lignocellulosic biomass through plant science. *New Phytol.* **209**:1366–1381.
- 780 **Martinoia, E.** (2018). Vacuolar transporters - Companions on a longtime journey. *Plant*  
781 *Physiol.* **176**:pp.01481.2017.
- 782 **Minchin, P. E. H., and McNaughton, G. S.** (1987). Xylem transport of recently fixed carbon  
783 within lupin. *Aust. J. Plant Physiol.* **14**.
- 784 **Mohebbi, B.** (2008). Application of ATR infrared spectroscopy in wood acetylation. *J. Agric.*  
785 *Sci. Technol.* **10**:253–259.
- 786 **Öhman, D., Demedts, B., Kumar, M., Gerber, L., Gorzsás, A., Goeminne, G., Hedenström,  
787 M., Ellis, B., Boerjan, W., and Sundberg, B.** (2013). MYB103 is required for

- 788 FERULATE-5-HYDROXYLASE expression and syringyl lignin biosynthesis in  
789 *Arabidopsis* stems. *Plant J.* **73**:63–76.
- 790 **Payyavula, R. S., Tay, K. H. C., Tsai, C.-J., and Harding, S. A.** (2011). The sucrose  
791 transporter family in *Populus*: the importance of a tonoplast PtaSUT4 to biomass and  
792 carbon partitioning. *Plant J.* **65**:757–770.
- 793 **Poschet, G., Hannich, B., Raab, S., Jungkunz, I., Klemens, P. A. W., Krueger, S., Wic, S.,**  
794 **Neuhaus, H. E., and Buttner, M.** (2011). A Novel *Arabidopsis* Vacuolar Glucose  
795 Exporter Is Involved in Cellular Sugar Homeostasis and Affects the Composition of Seed  
796 Storage Compounds. *Plant Physiol.* **157**:1664–1676.
- 797 **R Core Team** (2017). R: a language and environment for statistical computing. Advance  
798 Access published 2017.
- 799 **Roach, M., Arrivault, S., Mahboubi, A., Krohn, N., Sulpice, R., Stitt, M., and Niittylä, T.**  
800 (2017). Spatially resolved metabolic analysis reveals a central role for transcriptional  
801 control in carbon allocation to wood. *J. Exp. Bot.* **68**:3529–3539.
- 802 **Rohart, F., Gautier, B., Singh, A., and Lê Cao, K. A.** (2017). mixOmics: An R package for  
803 ‘omics feature selection and multiple data integration. *PLoS Comput. Biol.* **13**:1–19.
- 804 **Rstudio Team** (2015). RStudio: Integrated Development for R. Advance Access published  
805 2015.
- 806 **Sakr, S., Wang, M., Dédaldéchamp, F., Perez-Garcia, M.-D., Ogé, L., Hamama, L., and**  
807 **Atanassova, R.** (2018). The Sugar-Signaling Hub: Overview of Regulators and  
808 Interaction with the Hormonal and Metabolic Network. *Int. J. Mol. Sci.* **19**:2506.
- 809 **Schuetz, M., Smith, R., and Ellis, B.** (2012). Xylem tissue specification, patterning, and  
810 differentiation mechanisms. *J. Exp. Bot.* **64**:11–31.
- 811 **Sellami, S., Le Hir, R., Thorpe, M. R., Vilaine, F., Wolff, N., Brini, F., and Dinant, S.**  
812 (2019). Salinity effects on sugar homeostasis and vascular anatomy in the stem of the  
813 *Arabidopsis thaliana* inflorescence. *Int. J. Mol. Sci.* **20**:3167.
- 814 **Sibout, R., Plantegenet, S., and Hardtke, C. S.** (2008). Flowering as a Condition for Xylem  
815 Expansion in *Arabidopsis* Hypocotyl and Root. *Curr. Biol.* **18**:458–463.
- 816 **Smetana, O., Mäkilä, R., Lyu, M., Amiryousefi, A., Rodríguez, F. S., Wu, M., Solé-gil, A.,**

- 817 **Gavarrón, M. L., Siligato, R., Miyashima, S., et al.** (2019). High levels of auxin  
818 signalling define the stem-cell organizer of the vascular cambium. *Nature* **565**:485–491.
- 819 **Smit, M., McGregor, S., Sun, H., Gough, C., Bågman, A.-M., Soyars, C. L., Kroon, J. T.**  
820 **M., Gaudinier, A., Williams, C. J., Yang, X., et al.** (2019). A PXY-Mediated  
821 Transcriptional Network Integrates Signaling Mechanisms to Control Vascular  
822 Development in Arabidopsis. *Plant Cell* Advance Access published 2019,  
823 doi:10.1105/tpc.19.00562.
- 824 **Smith, R. A., Schuetz, M., Roach, M., Mansfield, S. D., Ellis, B., and Samuels, L.** (2013).  
825 Neighboring parenchyma cells contribute to *Arabidopsis* xylem lignification, while  
826 lignification of interfascicular fibers is cell autonomous. *Plant Cell* **25**:3988–3999.
- 827 **Smith, R. A., Schuetz, M., Karlen, S. D., Bird, D., Tokunaga, N., Sato, Y., Mansfield, S.**  
828 **D., Ralph, J., and Samuels, A. L.** (2017). Defining the diverse cell populations  
829 contributing to lignification in *Arabidopsis thaliana* stems. *Plant Physiol.* **174**:1028–1036.
- 830 **Spicer, R.** (2014). Symplasmic networks in secondary vascular tissues: Parenchyma  
831 distribution and activity supporting long-distance transport. *J. Exp. Bot.* **65**:1829–1848.
- 832 **Tolivia, D., and Tolivia, J.** (1987). Fasga: A new polychromatic method for simultaneous and  
833 differential staining of plant tissues. *J. Microsc.* **148**:113–117.
- 834 **Truernit, E., and Sauer, N.** (1995). The promoter of the *Arabidopsis thaliana* SUC2 sucrose-  
835 H<sup>+</sup> symporter gene directs expression of B-glucuronidase to the phloem: evidence for  
836 phloem loading and unloading by SUC2. *Planta* **196**:564–570.
- 837 **Vandesompele, J., De Preter, K., Pattyn, F., Poppe, B., Van Roy, N., De Paepe, A., and F.,**  
838 **S.** (2002). Accurate normalization of real-time quantitative RT-PCR data by geometric  
839 averaging of multiple internal control genes. *Genome Biol.* **3**:research0034.1-0034.11.
- 840 **Verbančič, J., Lunn, J. E., Stitt, M., and Persson, S.** (2018). Carbon supply and the regulation  
841 of cell wall synthesis. *Mol. Plant* **11**:75–94.
- 842 **Weiszmann, J., Fürtauer, L., Weckwerth, W., and Nägele, T.** (2018). Vacuolar sucrose  
843 cleavage prevents limitation of cytosolic carbohydrate metabolism and stabilizes  
844 photosynthesis under abiotic stress. *FEBS J.* Advance Access published 2018,  
845 doi:10.1111/febs.14656.
- 846 **Wickham, H.** (2016). *ggplot2: Elegant Graphics for Data Analysis*. New York: Springer-

- 847 Verlag.
- 848 **Wilke, C. O.** (2019). Cowplot: streamlined plot theme and plot annotation for “ggplot2”  
849 Advance Access published 2019.
- 850 **Wingenter, K., Schulz, A., Wormit, A., Wic, S., Trentmann, O., Hoermiller, I. I., Heyer,**  
851 **A. G., Marten, I., Hedrich, R., and Neuhaus, H. E.** (2010). Increased Activity of the  
852 Vacuolar Monosaccharide Transporter TMT1 Alters Cellular Sugar Partitioning, Sugar  
853 Signaling, and Seed Yield in Arabidopsis. *Plant Physiol.* **154**:665–677.
- 854 **Xuan, Y. H., Hu, Y. B., Chen, L.-Q., Sosso, D., Ducat, D. C., Hou, B.-H., and Frommer,**  
855 **W. B.** (2013). Functional role of oligomerization for bacterial and plant SWEET sugar  
856 transporter family. *Proc. Natl. Acad. Sci.* **110**:E3685–E3694.
- 857 **Yamada, K., Osakabe, Y., Mizoi, J., Nakashima, K., Fujita, Y., Shinozaki, K., and**  
858 **Yamaguchi-Shinozaki, K.** (2010). Functional analysis of an Arabidopsis thaliana abiotic  
859 stress-inducible facilitated diffusion transporter for monosaccharides. *J. Biol. Chem.*  
860 **285**:1138–1146.
- 861 **Yamaguchi, M., Ohtani, M., Mitsuda, N., Kubo, M., Ohme-Takagi, M., Fukuda, H., and**  
862 **Demura, T.** (2010). VND-INTERACTING2, a NAC Domain Transcription Factor,  
863 Negatively Regulates Xylem Vessel Formation in Arabidopsis. *Plant Cell* **22**:1249–1263.
- 864 **Yoo, S. D., Cho, Y. H., and Sheen, J.** (2007). Arabidopsis mesophyll protoplasts: A versatile  
865 cell system for transient gene expression analysis. *Nat. Protoc.* **2**:1565–1572.
- 866 **Zheng, M., Liu, X., Lin, J., Liu, X., Wang, Z., Xin, M., Yao, Y., Peng, H., Zhou, D. X., Ni,**  
867 **Z., et al.** (2019). Histone acetyltransferase GCN5 contributes to cell wall integrity and salt  
868 stress tolerance by altering the expression of cellulose synthesis genes. *Plant J.* **97**:587–  
869 602.
- 870 **Zhong, R., Demura, T., and Ye, Z.-H.** (2006). SND1, a NAC Domain Transcription Factor,  
871 Is a Key Regulator of Secondary Wall Synthesis in Fibers of Arabidopsis. *Plant Cell*  
872 *Online* **18**:3158–3170.
- 873 **Zhong, R., Lee, C., Zhou, J., McCarthy, R. L., and Ye, Z.-H.** (2008). A Battery of  
874 Transcription Factors Involved in the Regulation of Secondary Cell Wall Biosynthesis in  
875 Arabidopsis. *Plant Cell* **20**:2763–2782.

877 **FIGURE LEGENDS**

878 **Figure 1. Altered development of the inflorescence stem in the *swt16swt17* double mutant.**

879 (A) Transverse sections of the basal part of the inflorescence stem of 7-week-old plants stained  
880 with FASGA solution. Bars = 200  $\mu$ m.

881 (B-F) Boxplots showing the inflorescence stem cross-sectional area (B), the area occupied by  
882 xylem tissue (C) or phloem tissue (D) within a stem section, the ratio of xylem area to stem area  
883 (E) and the ratio of phloem area to stem area (F).

884 The box and whisker plots represent values from 7 to 8 independent plants. The lines represent  
885 median values, the tops and bottoms of the boxes represent the first and third quartiles  
886 respectively, and whisker extremities represent maximum and minimum data points. A one-  
887 way analysis of variance combined with the Tukey's comparison post-hoc test were performed.  
888 Values marked with the same letter were not significantly different from each other, whereas  
889 different letters indicate significant differences ( $P < 0.05$ ).

890

891 **Figure 2. Knockout of *SWEET16* gene expression impacts the proliferation of xylem cells.**

892 (A to I) Boxplots showing the inflorescence stem height (A) and diameter (B), the ratio of vessel  
893 number to fiber number (C), the cross-sectional area occupied by xylem tissue per vascular  
894 bundle (D), the average cross-sectional area of a xylary fiber (E) or of a xylem vessel (F), and  
895 the average number of xylem cells (G), of xylary fiber vessels (H) and of xylem vessels (I) per  
896 vascular bundle.

897 The box and whisker plots represent values from 5 to 7 independent plants (A and B) or from  
898 71, 53, 41 and 50 individual vascular bundles from wild type, *swt16*, *swt17* and *swt16swt17*  
899 respectively taken from 5-7 independent plants for each genotype (C-I). The lines represent  
900 median values, the tops and bottoms of the boxes represent the first and third quartiles  
901 respectively, and whisker extremities represent maximum and minimum data points. Stars  
902 denote significant differences between the mutant lines compared to the wild type according to  
903 a Student's *t*-test (\*  $P < 0.05$ ).

904

905 **Figure 3. Genes involved in the development of xylem secondary cell wall are deregulated**  
906 **in the *swt16swt17* double mutant.**

907 (A to I) The mRNAs were extracted from total inflorescence stems collected from 7-week-old  
908 wild-type, *swt16*, *swt17* and *swt16swt17* plants. The mRNA contents are expressed relative to  
909 those of the reference gene *UBQ5*.

910 (A) Heatmap of expression of candidate genes involved in xylem development and secondary  
911 cell wall biosynthesis in the inflorescence stem of the wild type, *swt16*, *swt17* and *swt16swt17*  
912 mutants. The values used to build the heatmap are the mean accumulation of transcripts ( $n=4$ )  
913 normalized by the median value of each gene and expressed as  $\log_2$  values. For each gene, the  
914 result of one-way ANOVA is displayed beside the heatmap. Those  $p$ -values below the  
915 significance threshold ( $P<0.05$ ) are in red.

916 (B to I) Boxplots showing the relative expression of *SND1* (B), *MYB46* (C), *VNI2* (D), *MYB4*  
917 (E), *MYB83* (F), *MYB54* (G), *SND3* (H) and *MYB103* (I). The box-and-whisker plots represent  
918 values from 4 biological replicates. The lines represent median values, the tops and bottoms of  
919 the boxes represent the first and third quartiles respectively, and the ends of the whiskers  
920 represent maximum and minimum data points. Black dots are outliers. Stars denote significant  
921 differences between the mutant line compared to the wild type according to a Student's  $t$ -test (\*  
922  $P<0.05$ ; \*\*  $P<0.01$ ; \*\*\*  $P<0.001$ ). The experiment was repeated twice and gave similar results.

923

924 **Figure 4. The composition of the xylem secondary cell wall is altered in the *swt16swt17***  
925 **double mutant.**

926 FTIR spectra were acquired on xylem tissue from sections of the basal part of the inflorescence  
927 stem. All spectra were baseline-corrected and area-normalized in the range  $1800-800\text{ cm}^{-1}$ .

928 (A) Average FTIR spectra were generated from 266, 170, 123 and 170 spectra for the wild type,  
929 *swt16*, *swt17* and *swt16swt17* respectively, obtained using three independent plants for each  
930 genotype.

931 (B) Comparison of FTIR spectra obtained from xylem cells of the *swt16*, *swt17*, and *swt16swt17*  
932 mutants. A Student's  $t$ -test was performed to compare the absorbances for the wild type, single  
933 and double mutants. The results were plotted against the corresponding wavenumbers. T-values  
934 (vertical axis) between  $-2$  and  $+2$  correspond to non-significant differences ( $p$ -value  $< 0.05$ )  
935 between the genotypes tested ( $n=3$ ). T-values above  $+2$  or below  $-2$  correspond to, respectively,  
936 significantly weaker or stronger absorbances in the mutant spectra relative to the wild type.

937 (C to E) Boxplots of the cellulose (C-O vibration band at  $1050\text{ cm}^{-1}$ ) (C), hemicellulose (C-O  
938 and C-C bond stretching at  $1740\text{ cm}^{-1}$ ) (D) peak height and lignin peak height ratio ( $1510/1595$

939 cm<sup>-1</sup>) (E). The lines represent median values, the tops and bottoms of the boxes represent the  
940 first and third quartiles respectively, and the ends of the whiskers represent maximum and  
941 minimum data points. The boxplots represent values (shown as colored dots) from 266, 170,  
942 123 and 170 spectra from the wild type, *swt16*, *swt17* and *swt16swt17* respectively, obtained  
943 from three independent plants for each genotype. A one-way analysis of variance combined  
944 with the Tukey's comparison post-hoc test were performed. Values marked with the same letter  
945 were not significantly different from each other, whereas different letters indicate significant  
946 differences ( $P < 0.05$ ).

947

948 **Figure 5. Hexoses accumulate in the inflorescence stem of the *swt16swt17* double mutant.**

949 (A and B) Multivariate analysis of the metabolomic datasets obtained from wild-type and  
950 *swt16swt17* inflorescence stems. Metabolites were extracted from eight individual plants for  
951 each genotype and analyzed by GC-MS. Plants were grown under long-day conditions for seven  
952 weeks. (A) sPLS-DA score plot for wild-type (purple) and *swt16swt17* (green) samples. The  
953 variable plot of the sPLS-DA is presented in (B) and metabolites in red are significantly  
954 different between the wild type and the *swt16swt17* mutant according to Student's *t*-test  
955 ( $P < 0.05$ ) (Supplemental Table 3). ADP: adenosine-5-diphosphate; G-6-P: glucose-6-  
956 phosphate.

957 (C) Boxplots showing the sucrose, glucose, fructose and starch contents in the inflorescence  
958 stems of the wild type (in purple) and the *swt16swt17* (in green) mutant grown under long-day  
959 conditions for seven weeks. The box-and-whisker plots represent values from 9 biological  
960 replicates coming from plants grown at two separated times. The lines represent median values,  
961 the tops and bottoms of the boxes represent the first and third quartiles respectively, and the  
962 ends of the whiskers represent maximum and minimum data points. Black dots are outliers.  
963 Asterisks above the boxes indicate statistical differences between genotypes according to  
964 Student's *t*-test ( $P < 0.05$ ).

965

966 **Figure 6. *SWEET16* and *SWEET17* expression patterns vary during inflorescence stem  
967 development and the two proteins interact physically.**

968 (A to C) *pSWEET16:GUS* expression pattern in sections taken at different positions in the  
969 inflorescence stem of 8-week-old plants. (D to F) *pSWEET17:GUS* expression pattern in



970 sections taken at different positions in the inflorescence stem section of 8-week-old plants.  
971 Sections were taken in a stem region where the growth was still rapid (A, D and inset), in a  
972 stem region where elongation growth had finished but where thickening of the secondary cell  
973 wall was still ongoing (B, E and inset), and at the bottom of the stem, a region that corresponds  
974 to a mature stem (C, F and inset). Arrows point to cells showing blue GUS staining and asterisks  
975 indicate xylary parenchyma cells. Lignin is colored pink after phloroglucinol staining. The  
976 intensity of the pink color is correlated with the stage of lignification of the xylary vessels. ep:  
977 epidermis; co: cortex; iff: interfascicular fibers; ph: phloem; xy: xylem.

978 (G to I) Fluorescence in an Arabidopsis mesophyll protoplast expressing *SWEET16::cCFP-C*  
979 and *SWEET17::nCerulean-C* revealed by false color cyan (G). Chloroplast auto-fluorescence is  
980 in false color red (H). Merge of (G) and (H) and bright field image (I). Invaginations around  
981 the chloroplasts in (G) and (I) indicate that SWEET16 and SWEET17 interact at the vacuolar  
982 membrane. Scale bar = 17  $\mu$ m.

983

984 **Figure 7. Model for the role of SWEET transporters during xylem development in**  
985 **Arabidopsis inflorescence stems.**

986 This model is based on the results presented in this work on SWEET16 and SWEET17 and  
987 those previously published on SWEET11, SWEET12 and SUC2 transporters (Truernit and  
988 Sauer, 1995; Chen et al., 2012; Gould et al., 2012; Le Hir et al., 2015). In the phloem tissue,  
989 sucrose and hexoses present in the phloem parenchyma cells (PPC) are exported into the  
990 apoplastic space between PPC and companion cells (CC) by the sugar transporters SWEET11  
991 and SWEET12 (fuchsia circles). Apoplastic sucrose is then imported into the CC cytosol *via*  
992 the SUC2 transporter (yellow circles) before entering the phloem sieve tubes (SE) and being  
993 transported over long distances (light green arrows). A part of these sugars leaks from the SE,  
994 most probably through plasmodesmata (orange arrow), and reaches axial sinks (e.g.  
995 procambium and xylem) while another part of the sugars is reimported inside the SE, mostly  
996 through the action of SUC2 (1). In the cells at the cambium-xylem boundary, soluble sugars are  
997 probably exported by SWEET16 (light blue circles) into the cytosol in order to sustain the  
998 division of xylem cells (2). Given the high cytosolic sugar demand required to sustain the  
999 secondary cell wall (SCW) deposition process (3), sugars stored in the vacuole are likely  
1000 exported into the cytosol through the action of SWEET16 (purple circles) and/or SWEET17  
1001 (green circles). Interaction between SWEET16 and SWEET17 is shown as bicolor circles. After  
1002 the completion of programmed cell death (PCD) and the disintegration of the vacuole (4), the

1003 SCW is still being reinforced (5) and we can assume that the sugar demand is still high. At this  
1004 stage, the sugars stored in the vacuole of the xylary parenchyma cells (XPC) are likely released  
1005 by SWEET16 and/or SWEET17 and then exported into the apoplastic space by SWEET11 and  
1006 SWEET12. Whether it is the sugars themselves or more complex cell wall sugar-derived  
1007 molecules that reach the dead xylem cells remains an open question.  
1008

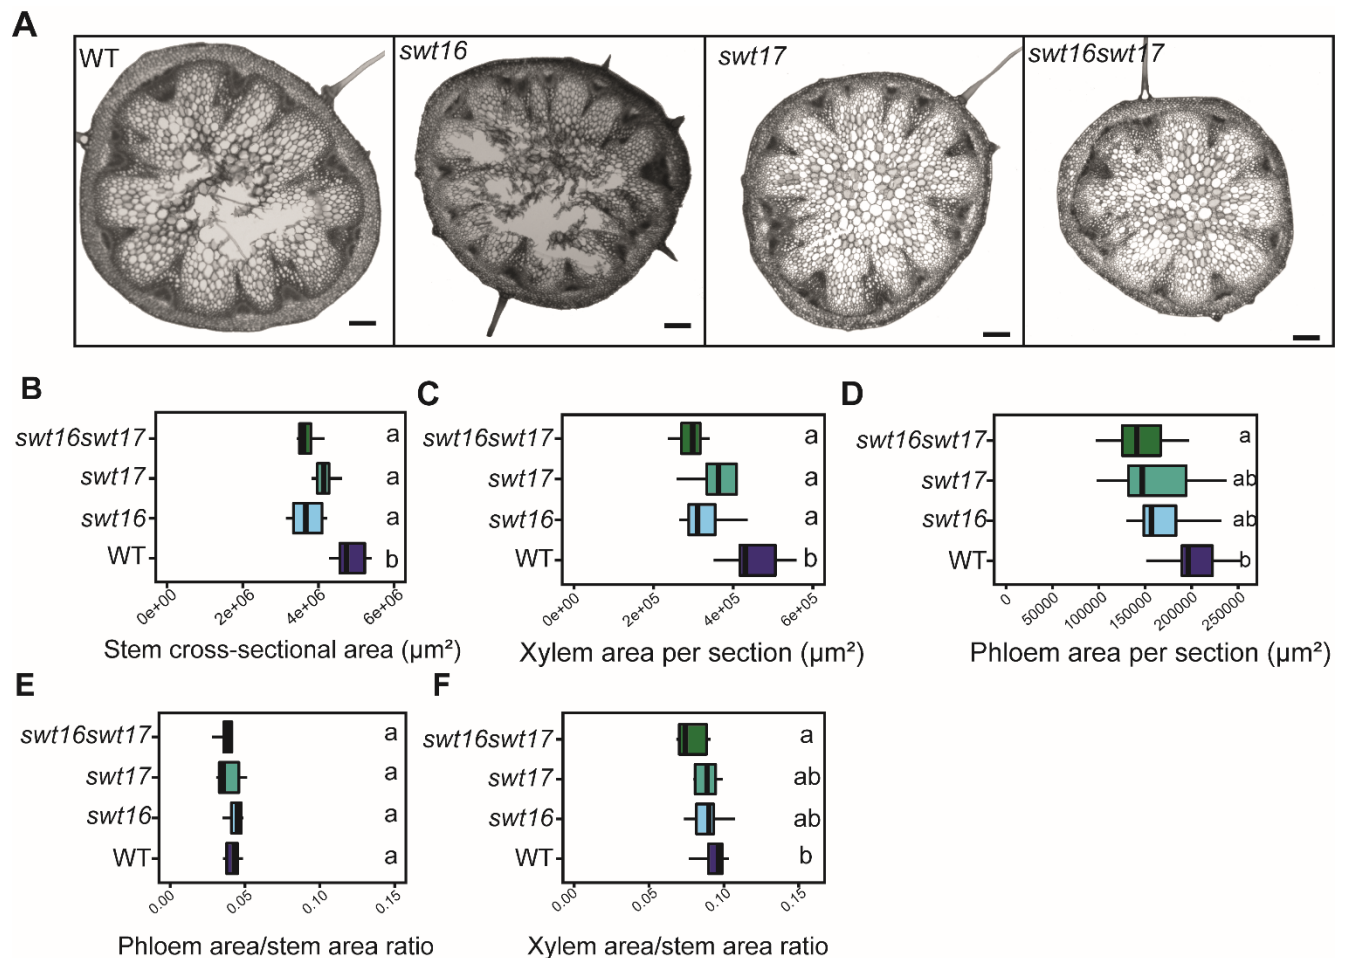

1009

1010

1011 **Figure 1. Altered development of the inflorescence stem in the *swt16swt17* double mutant.**

1012 (A) Transverse sections of the basal part of the inflorescence stem of 7-week-old plants stained  
1013 with FASGA solution. Bars = 200  $\mu\text{m}$ .

1014 (B-F) Boxplots showing the inflorescence stem cross-sectional area (B), the area occupied by  
1015 xylem tissue (C) or phloem tissue (D) within a stem section, the ratio of xylem area to stem area  
1016 (E) and the ratio of phloem area to stem area (F).

1017 The box and whisker plots represent values from 7 to 8 independent plants. The lines represent  
1018 median values, the tops and bottoms of the boxes represent the first and third quartiles  
1019 respectively, and whisker extremities represent maximum and minimum data points. A one-  
1020 way analysis of variance combined with the Tukey's comparison post-hoc test were performed.  
1021 Values marked with the same letter were not significantly different from each other, whereas  
1022 different letters indicate significant differences ( $P < 0.05$ ).

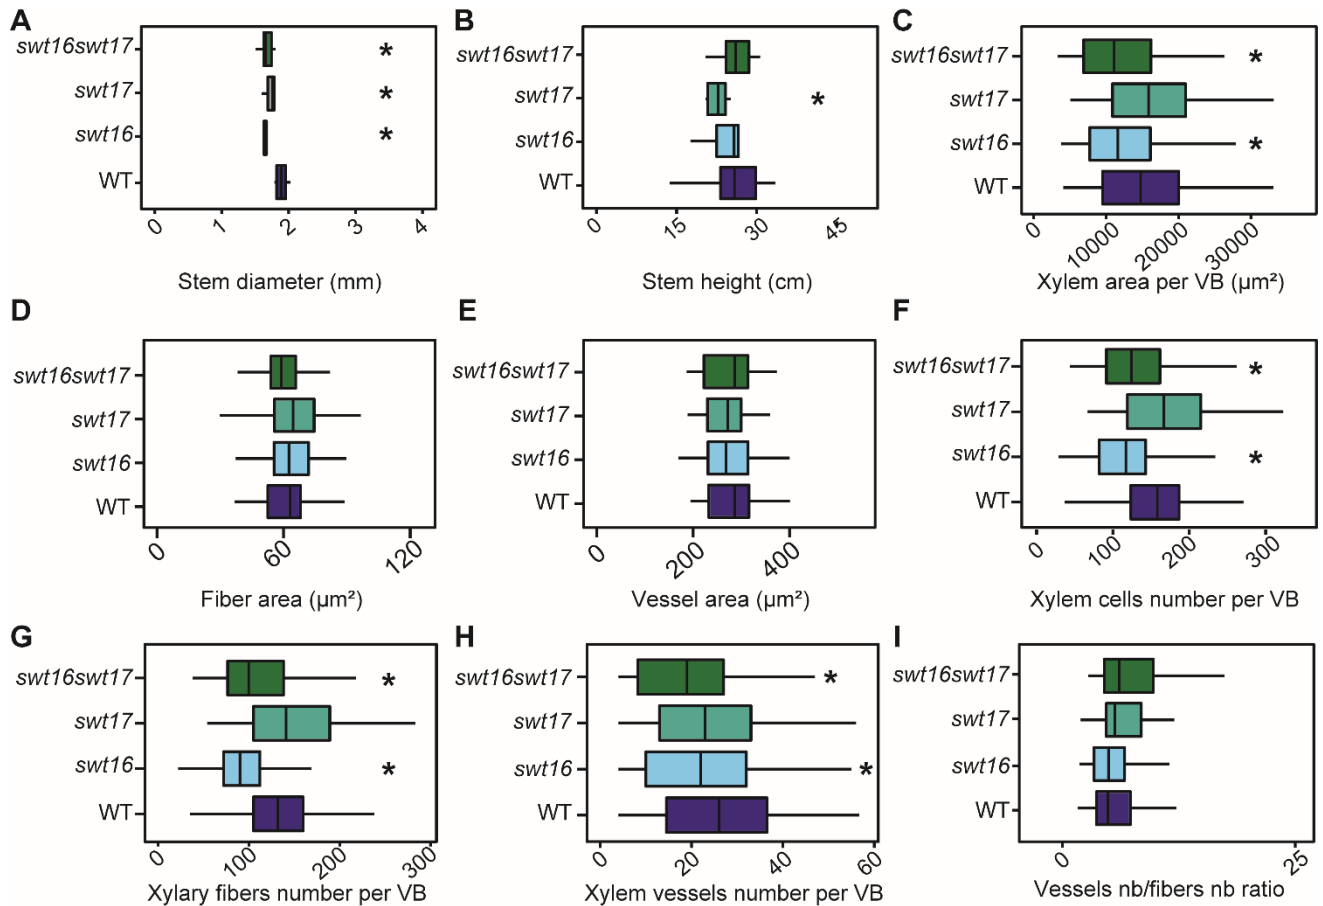

1023

1024

1025 **Figure 2. Knockout of *SWEET16* gene expression impacts the proliferation of xylem cells.**

1026 (A to I) Boxplots showing the inflorescence stem height (A) and diameter (B), the ratio of vessel  
 1027 number to fiber number (C), the cross-sectional area occupied by xylem tissue per vascular  
 1028 bundle (D), the average cross-sectional area of a xylary fiber (E) or of a xylem vessel (F), and  
 1029 the average number of xylem cells (G), of xylary fiber vessels (H) and of xylem vessels (I) per  
 1030 vascular bundle.

1031 The box and whisker plots represent values from 5 to 7 independent plants (A and B) or from  
 1032 71, 53, 41 and 50 individual vascular bundles from wild type, *swt16*, *swt17* and *swt16swt17*  
 1033 respectively taken from 5-7 independent plants for each genotype (C-I). The lines represent  
 1034 median values, the tops and bottoms of the boxes represent the first and third quartiles  
 1035 respectively, and whisker extremities represent maximum and minimum data points. Stars  
 1036 denote significant differences between the mutant lines compared to the wild type according to  
 1037 a Student's *t*-test (\*  $P < 0.05$ ).

1038

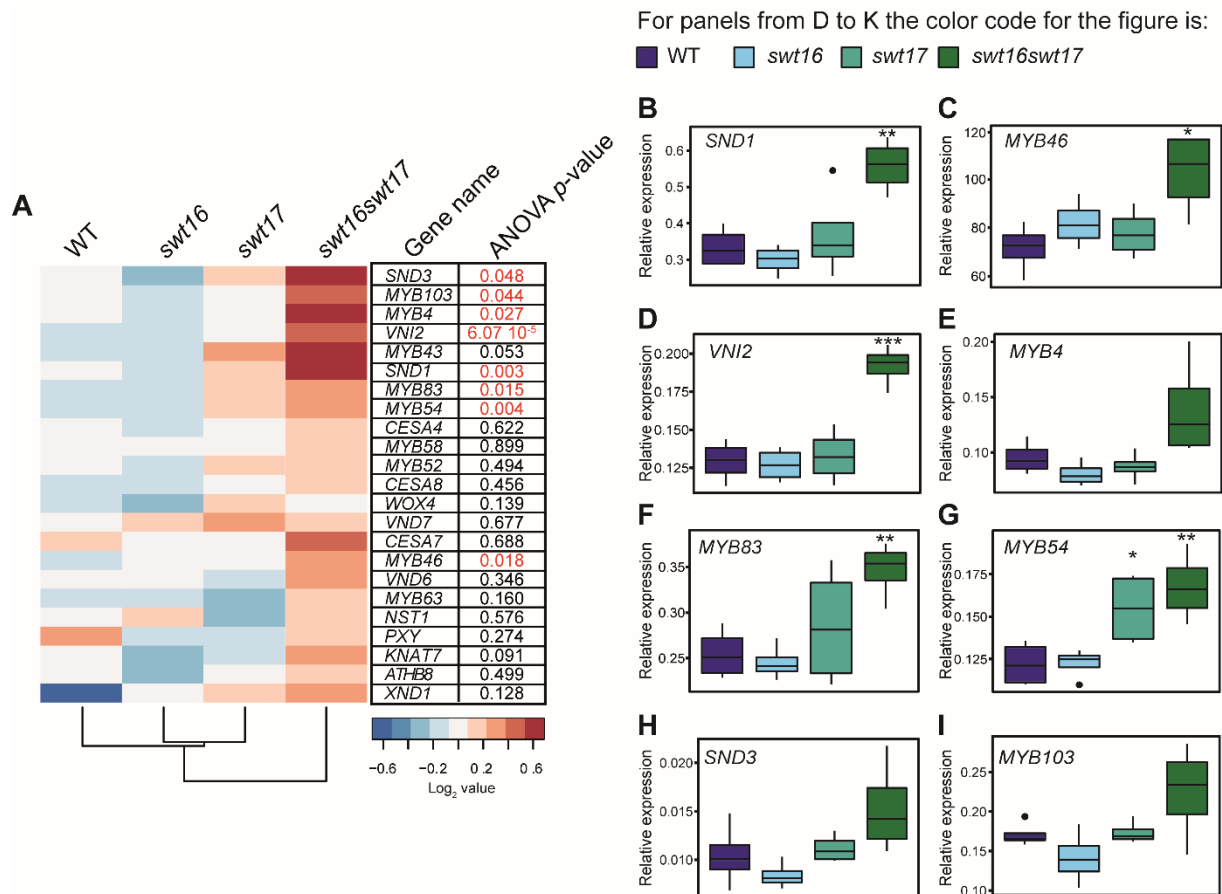

1039

1040

1041 **Figure 3. Genes involved in the development of xylem secondary cell wall are deregulated**  
 1042 **in the *swt16swt17* double mutant.**

1043 (A to I) The mRNAs were extracted from total inflorescence stems collected from 7-week-old  
 1044 wild-type, *swt16*, *swt17* and *swt16swt17* plants. The mRNA contents are expressed relative to  
 1045 those of the reference gene *UBQ5*.

1046 (A) Heatmap of expression of candidate genes involved in xylem development and secondary  
 1047 cell wall biosynthesis in the inflorescence stem of the wild type, *swt16*, *swt17* and *swt16swt17*  
 1048 mutants. The values used to build the heatmap are the mean accumulation of transcripts ( $n=4$ )  
 1049 normalized by the median value of each gene and expressed as  $\log_2$  values. For each gene, the  
 1050 result of one-way ANOVA is displayed beside the heatmap. Those  $p$ -values below the  
 1051 significance threshold ( $P<0.05$ ) are in red.

1052 (B to I) Boxplots showing the relative expression of *SND1* (B), *MYB46* (C), *VNI2* (D), *MYB4*  
 1053 (*MYB83* (F), *MYB54* (G), *SND3* (H) and *MYB103* (I). The box-and-whisker plots represent  
 1054 values from 4 biological replicates. The lines represent median values, the tops and bottoms of  
 1055 the boxes represent the first and third quartiles respectively, and the ends of the whiskers

1056 represent maximum and minimum data points. Black dots are outliers. Stars denote significant  
1057 differences between the mutant line compared to the wild type according to a Student's *t*-test (\*  
1058  $P < 0.05$ ; \*\*  $P < 0.01$ ; \*\*\*  $P < 0.001$ ). The experiment was repeated twice and gave similar results.

1059

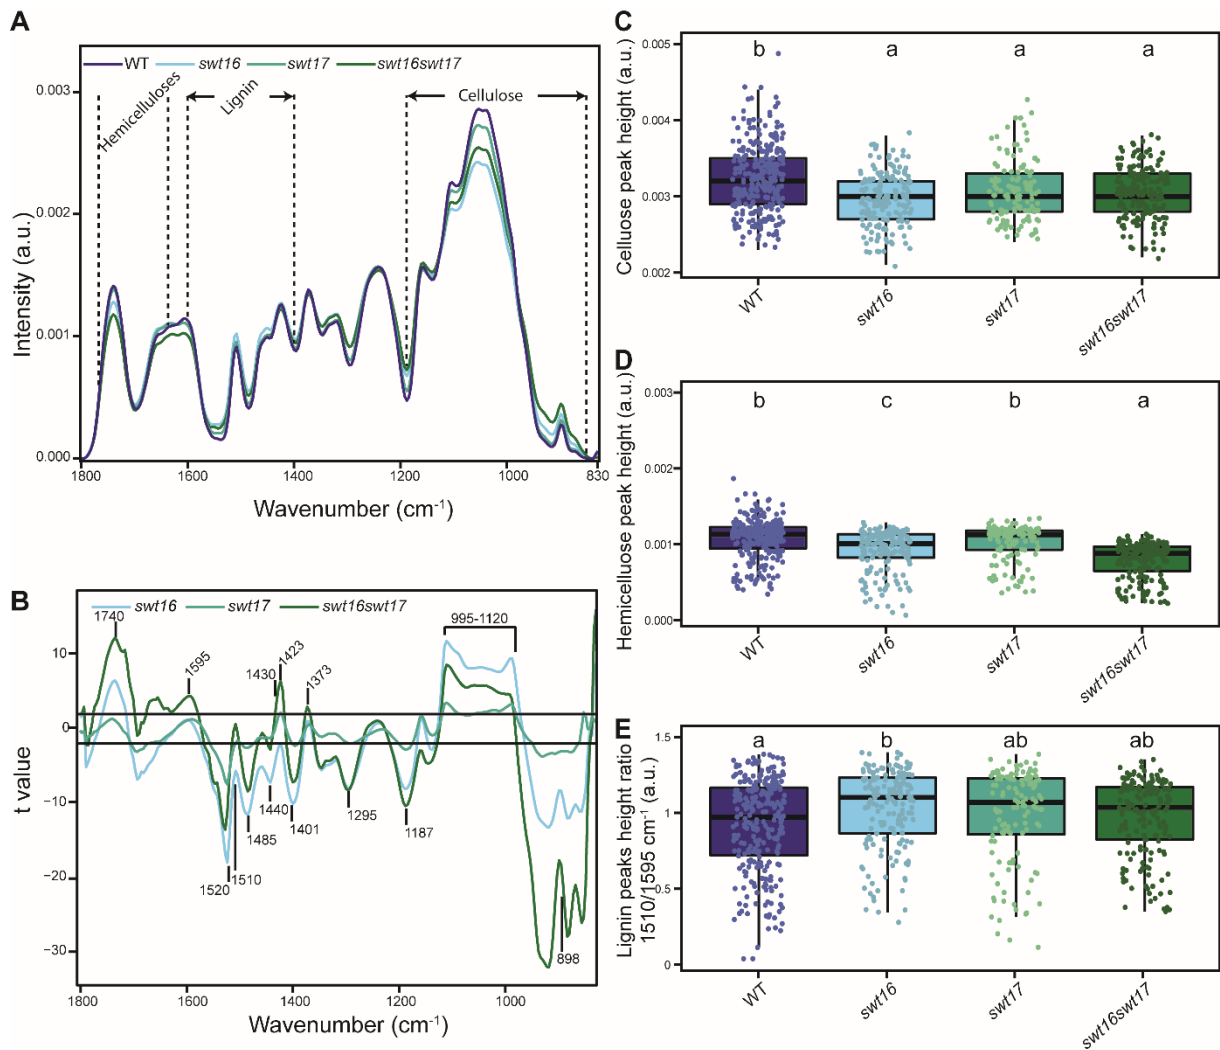

1060

1061

1062 **Figure 4. The composition of the xylem secondary cell wall is altered in the *swt16swt17***  
1063 **double mutant.**

1064 FTIR spectra were acquired on xylem tissue from sections of the basal part of the inflorescence  
1065 stem. All spectra were baseline-corrected and area-normalized in the range 1800-800 cm<sup>-1</sup>.

1066 (A) Average FTIR spectra were generated from 266, 170, 123 and 170 spectra for the wild type,  
1067 *swt16*, *swt17* and *swt16swt17* respectively, obtained using three independent plants for each  
1068 genotype.

1069 (B) Comparison of FTIR spectra obtained from xylem cells of the *swt16*, *swt17*, and *swt16swt17*  
1070 mutants. A Student's *t*-test was performed to compare the absorbances for the wild type, single  
1071 and double mutants. The results were plotted against the corresponding wavenumbers. T-values  
1072 (vertical axis) between -2 and +2 correspond to non-significant differences (*p*-value < 0.05)  
1073 between the genotypes tested (n=3). T-values above +2 or below -2 correspond to, respectively,  
1074 significantly weaker or stronger absorbances in the mutant spectra relative to the wild type.

1075 (C to E) Boxplots of the cellulose (C-O vibration band at 1050 cm<sup>-1</sup>) (C), hemicellulose (C-O  
1076 and C-C bond stretching at 1740 cm<sup>-1</sup>) (D) peak height and lignin peak height ratio (1510/1595  
1077 cm<sup>-1</sup>) (E). The lines represent median values, the tops and bottoms of the boxes represent the  
1078 first and third quartiles respectively, and the ends of the whiskers represent maximum and  
1079 minimum data points. The boxplots represent values (shown as colored dots) from 266, 170,  
1080 123 and 170 spectra from the wild type, *swt16*, *swt17* and *swt16swt17* respectively, obtained  
1081 from three independent plants for each genotype. A one-way analysis of variance combined  
1082 with the Tukey's comparison post-hoc test were performed. Values marked with the same letter  
1083 were not significantly different from each other, whereas different letters indicate significant  
1084 differences ( $P < 0.05$ ).  
1085



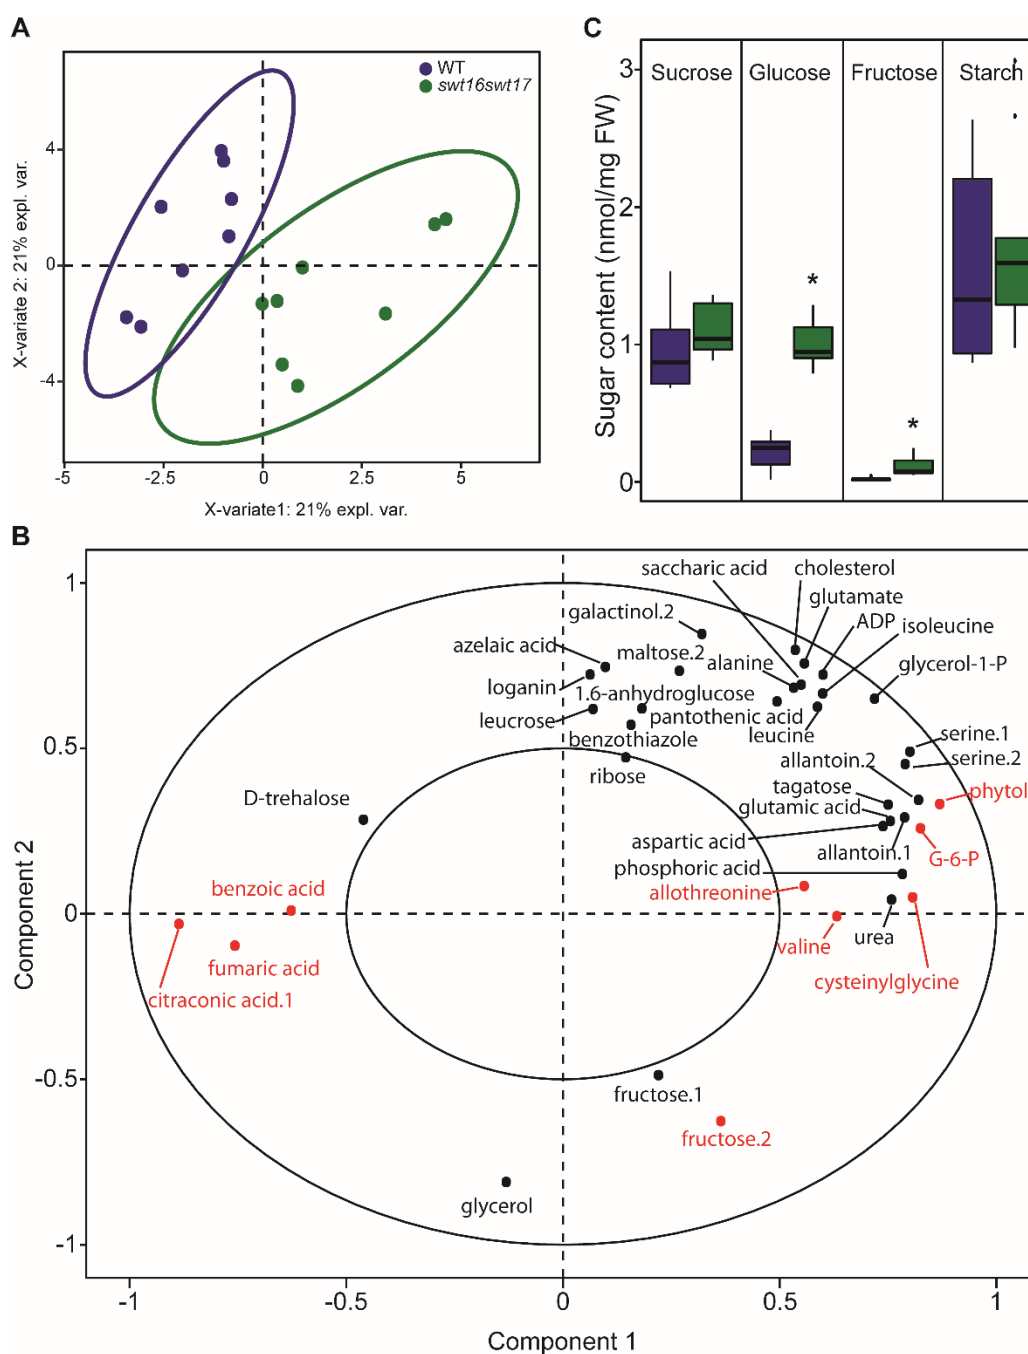

1086

1087 **Figure 5. Hexoses accumulate in the inflorescence stem of the *swt16swt17* double mutant.**

1088 (A and B) Multivariate analysis of the metabolomic datasets obtained from wild-type and  
 1089 *swt16swt17* inflorescence stems. Metabolites were extracted from eight individual plants for  
 1090 each genotype and analyzed by GC-MS. Plants were grown under long-day conditions for seven  
 1091 weeks. (A) sPLS-DA score plot for wild-type (purple) and *swt16swt17* (green) samples. The  
 1092 variable plot of the sPLS-DA is presented in (B) and metabolites in red are significantly  
 1093 different between the wild type and the *swt16swt17* mutant according to Student's *t*-test  
 1094 ( $P < 0.05$ ) (Supplemental Table 3). ADP: adenosine-5-diphosphate; G-6-P: glucose-6-  
 1095 phosphate.

1096 (C) Boxplots showing the sucrose, glucose, fructose and starch contents in the inflorescence  
1097 stems of the wild type (in purple) and the *swt16swt17* (in green) mutant grown under long-day  
1098 conditions for seven weeks. The box-and-whisker plots represent values from 9 biological  
1099 replicates coming from plants grown at two separated times. The lines represent median values,  
1100 the tops and bottoms of the boxes represent the first and third quartiles respectively, and the  
1101 ends of the whiskers represent maximum and minimum data points. Black dots are outliers.  
1102 Asterisks above the boxes indicate statistical differences between genotypes according to  
1103 Student's *t*-test ( $P < 0.05$ ).

1104

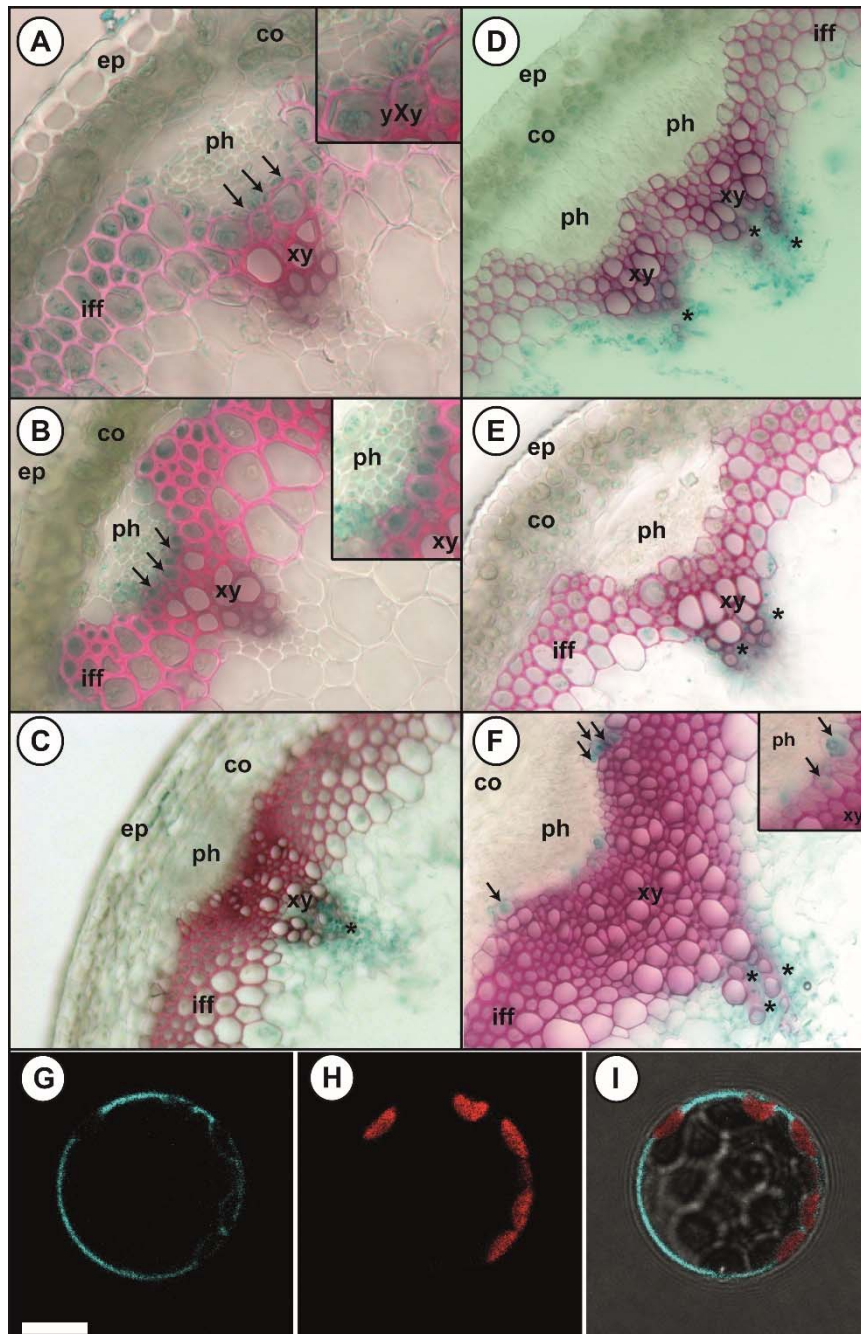

1105

1106

1107 **Figure 6. *SWEET16* and *SWEET17* expression patterns vary during inflorescence stem**  
1108 **development and the two proteins interact physically.**

1109 (A to C) *pSWEET16:GUS* expression pattern in sections taken at different positions in the  
1110 inflorescence stem of 8-week-old plants. (D to F) *pSWEET17:GUS* expression pattern in  
1111 sections taken at different positions in the inflorescence stem section of 8-week-old plants.  
1112 Sections were taken in a stem region where the growth was still rapid (A, D and inset), in a  
1113 stem region where elongation growth had finished but where thickening of the secondary cell  
1114 wall was still ongoing (B, E and inset), and at the bottom of the stem, a region that corresponds

1115 to a mature stem (C, F and inset). Arrows point to cells showing blue GUS staining and asterisks  
1116 indicate xylary parenchyma cells. Lignin is colored pink after phloroglucinol staining. The  
1117 intensity of the pink color is correlated with the stage of lignification of the xylary vessels. ep:  
1118 epidermis; co: cortex; iff: interfascicular fibers; ph: phloem; xy: xylem.

1119 (G to I) Fluorescence in an Arabidopsis mesophyll protoplast expressing *SWEET16::cCFP-C*  
1120 and *SWEET17::nCerulean-C* revealed by false color cyan (G). Chloroplast auto-fluorescence is  
1121 in false color red (H). Merge of (G) and (H) and bright field image (I). Invaginations around  
1122 the chloroplasts in (G) and (I) indicate that SWEET16 and SWEET17 interact at the vacuolar  
1123 membrane. Scale bar = 17  $\mu$ m.

1124

1125

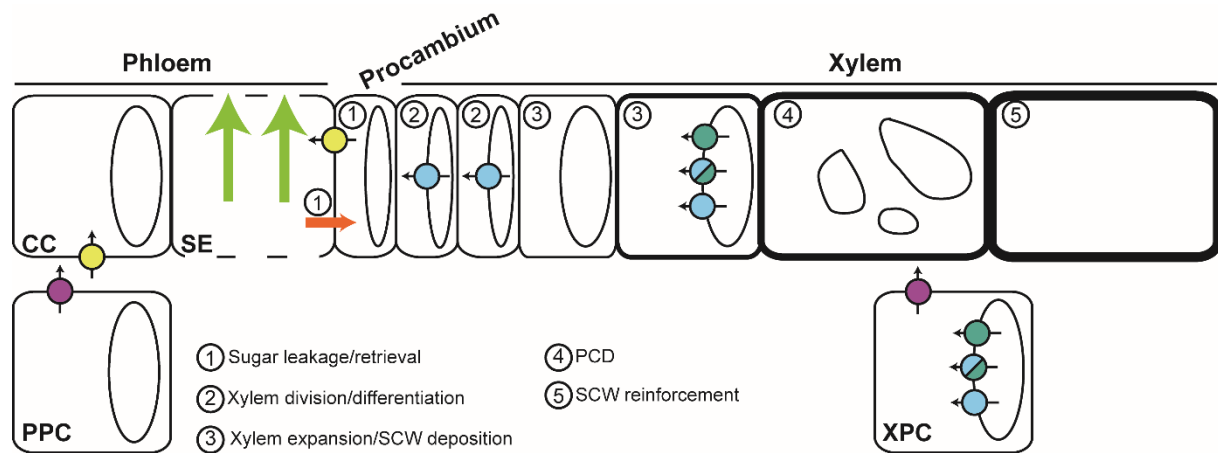

1126

1127

1128 **Figure 7. Model for the role of SWEET transporters during xylem development in**  
 1129 **Arabidopsis inflorescence stems.**

1130 This model is based on the results presented in this work on SWEET16 and SWEET17 and  
 1131 those previously published on SWEET11, SWEET12 and SUC2 transporters (Truernit and  
 1132 Sauer, 1995; Chen et al., 2012; Gould et al., 2012; Le Hir et al., 2015). In the phloem tissue,  
 1133 sucrose and hexoses present in the phloem parenchyma cells (PPC) are exported into the  
 1134 apoplastic space between PPC and companion cells (CC) by the sugar transporters SWEET11  
 1135 and SWEET12 (fuchsia circles). Apoplastic sucrose is then imported into the CC cytosol *via*  
 1136 the SUC2 transporter (yellow circles) before entering the phloem sieve tubes (SE) and being  
 1137 transported over long distances (light green arrows). A part of these sugars leaks from the SE,  
 1138 most probably through plasmodesmata (orange arrow), and reaches axial sinks (e.g.  
 1139 procambium and xylem) while another part of the sugars is reimported inside the SE, mostly  
 1140 through the action of SUC2 (1). In the cells at the cambium-xylem boundary, soluble sugars are  
 1141 probably exported by SWEET16 (light blue circles) into the cytosol in order to sustain the  
 1142 division of xylem cells (2). Given the high cytosolic sugar demand required to sustain the  
 1143 secondary cell wall (SCW) deposition process (3), sugars stored in the vacuole are likely  
 1144 exported into the cytosol through the action of SWEET16 (purple circles) and/or SWEET17  
 1145 (green circles). Interaction between SWEET16 and SWEET17 is shown as bicolor circles. After  
 1146 the completion of programmed cell death (PCD) and the disintegration of the vacuole (4), the  
 1147 SCW is still being reinforced (5) and we can assume that the sugar demand is still high. At this  
 1148 stage, the sugars stored in the vacuole of the xylary parenchyma cells (XPC) are likely released  
 1149 by SWEET16 and/or SWEET17 and then exported into the apoplastic space by SWEET11 and  
 1150 SWEET12. Whether it is the sugars themselves or more complex cell wall sugar-derived  
 1151 molecules that reach the dead xylem cells remains an open question.

1152 **Supplemental Information for**

1153

1154 **Hexose fluxes, mediated by vacuolar SWEET transporters, are important for xylem**  
1155 **development in the inflorescence stem of *Arabidopsis thaliana*.**

1156

1157 Emilie Aubry, Beate Hoffmann, Françoise Vilaine, Françoise Gilard, Patrick A.W. Klemens,  
1158 Florence Guérard, Bertrand Gakière, H. Ekkehard Neuhaus, Catherine Bellini, Sylvie Dinant  
1159 and Rozenn Le Hir

1160

1161 Corresponding author:

1162 Email: [rozenn.le-hir@inrae.fr](mailto:rozenn.le-hir@inrae.fr)

1163

1164 **This PDF includes:**

1165 Supplemental Figures 1 to 5

1166 Supplemental Tables 1 to 5

1167

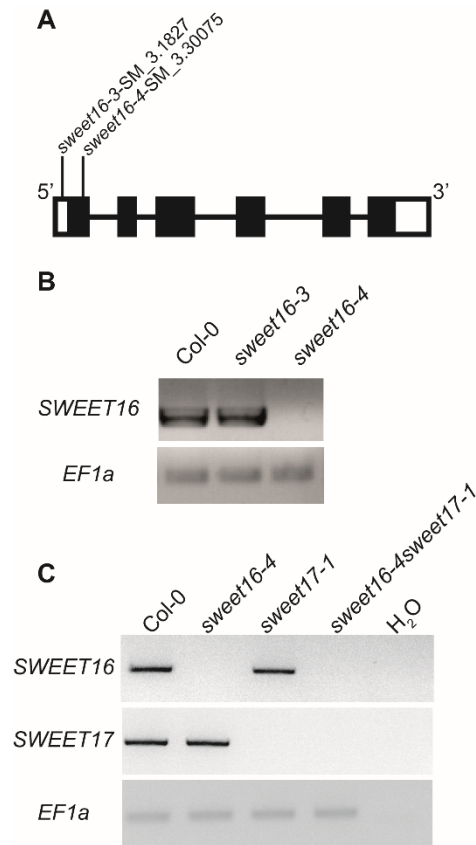

1168

1169

1170 **Supplemental Figure 1. Identification of *SWEET16* insertion lines and characterization of**  
1171 **the *sweet16-4sweet17-1* mutant.**

1172 (A) Positions of the T-DNA insertions in *SWEET16*. White boxes represent the UTR sequences,  
1173 black boxes are exon sequences and black lines between the black boxes are intron sequences.  
1174 (B) RT-PCR analysis of *SWEET16* expression in the single mutant lines *sweet16-3* and  
1175 *sweet16-4*. Total RNA was isolated from 10-day-old seedlings grown *in vitro* and the resulting  
1176 cDNAs were used for amplification with primers designed to lie between the start and stop  
1177 codon of the *SWEET16* sequence (for primer sequences see Supplemental Table 4). Level of  
1178 expression of EF1 $\alpha$  was used as a loading control.

1179 (C) RT-PCR analysis of *SWEET16* and *SWEET17* expression in the floral stem of the *sweet16-*  
1180 *4sweet17-1* mutant line. Total RNA was isolated from 7-week-old floral stem of plants grown  
1181 in long-day conditions. After reverse transcription, the cDNAs were used for amplification with  
1182 primers designed between the start and stop codon of the *SWEET16* and/or *SWEET17* sequences  
1183 (for primers sequences see Supplemental Table 4). Expression of EF1 $\alpha$  was used as a loading  
1184 control.

1185

1186

1187

1188

1189

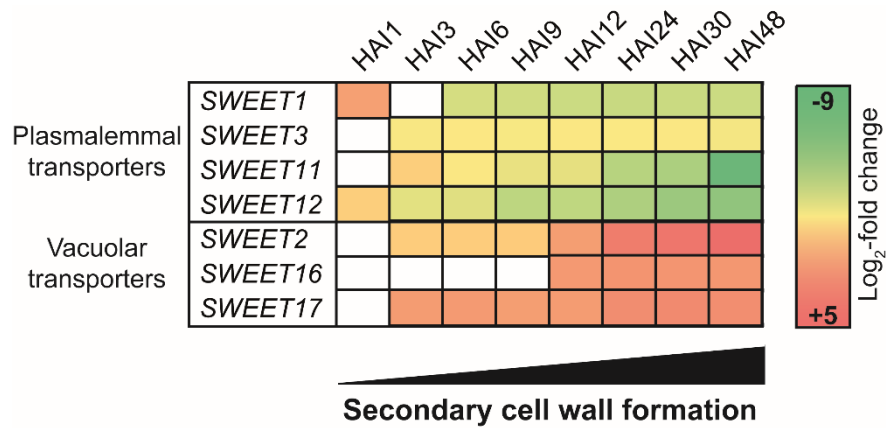

1190

1191

1192 **Supplemental Figure 2. Differential expression of *SWEET* genes during secondary cell**  
1193 **wall formation in the xylem vessels.**

1194 Changes in transcript levels were extracted from data on RNA-seq analysis performed by Li et  
1195 al. (2016) and presented as log<sub>2</sub>-fold changes in comparison with the control (DMSO treatment  
1196 of the DEX-inducible VND7 line) in colored boxes. HAI1-48 refer to the numbers of Hours  
1197 After DEX Induction. A white square indicates that the gene was not differentially expressed  
1198 at that time point.

1199

1200

1201



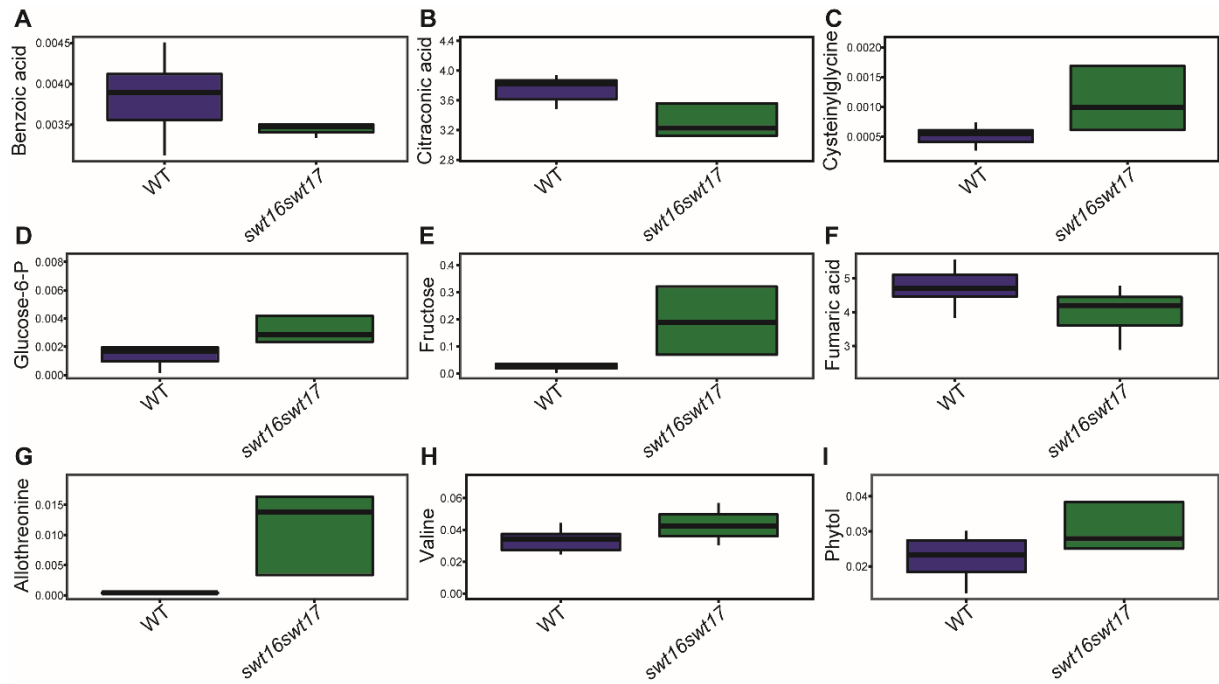

1202

1203

1204 **Supplemental Figure 3. Nine out of 158 metabolites identified by GC-MS differ significantly**  
1205 **between the wild type and the *swt16swt17* double mutant.**

1206 Boxplots showing the relative quantities of benzoic acid (A), citraconic acid (B), cysteinylglycine (C),  
1207 glucose-6-phosphate (D), fructose (E), fumaric acid (F), allothreonine (G), valine (H) and phytol (I) in  
1208 the inflorescence stem of the wild type and the *swt16swt17* mutant grown in long-day conditions for  
1209 seven weeks. Each of the box-and-whisker plots represents values from 8 individual plants for each  
1210 genotype. The lines represent median values, the tops and bottoms of the boxes represent the first and  
1211 third quartiles respectively, and the ends of the whiskers represent maximum and minimum data points.

1212

1213

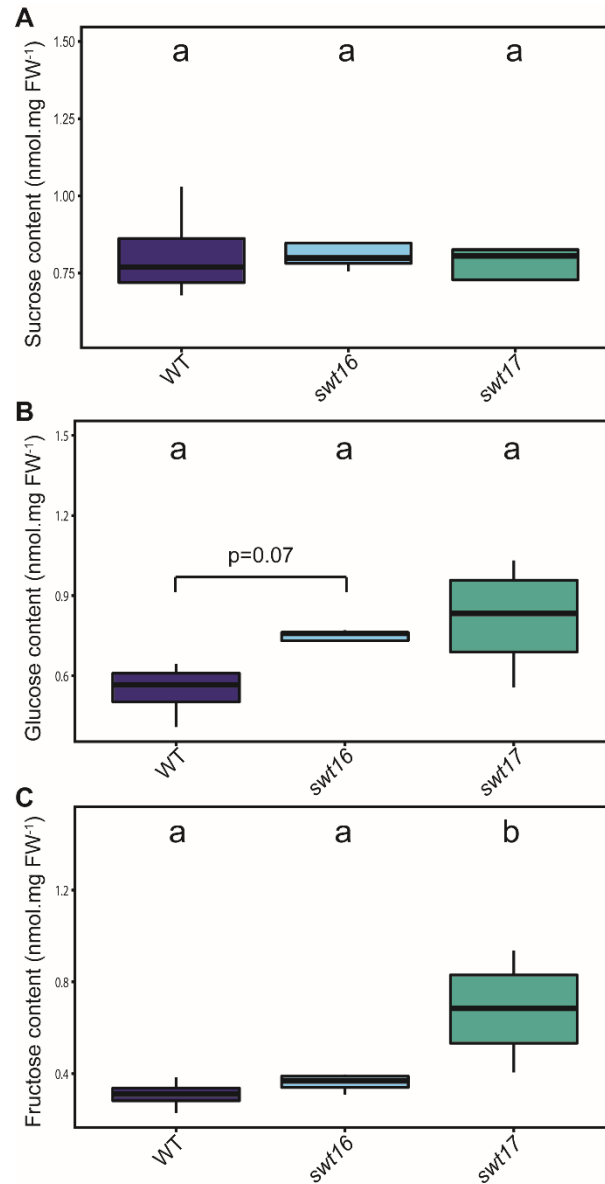

1214

1215

1216 **Supplemental Figure 4. Fructose accumulation in the inflorescence stem of the *swt17***  
1217 **mutant.**

1218 (A-C) Boxplots showing the sucrose (A), glucose (B) and fructose (C) contents of the inflorescence  
1219 stems of the wild type and the *swt16* and *swt17* mutants grown under long-day conditions for seven  
1220 weeks. Each of the box-and-whisker plots represents values from 4 biological replicates for each  
1221 genotype. The lines represent median values, the tops and bottoms of the boxes represent the first and  
1222 third quartiles respectively and the ends of the whiskers represent maximum and minimum data points.  
1223 A one-way analysis of variance combined with the Tukey's comparison post-hoc test was performed.  
1224 Values marked with the same letter were not significantly different from each other, whereas different  
1225 letters indicate significant differences ( $P < 0.05$ ).

1226

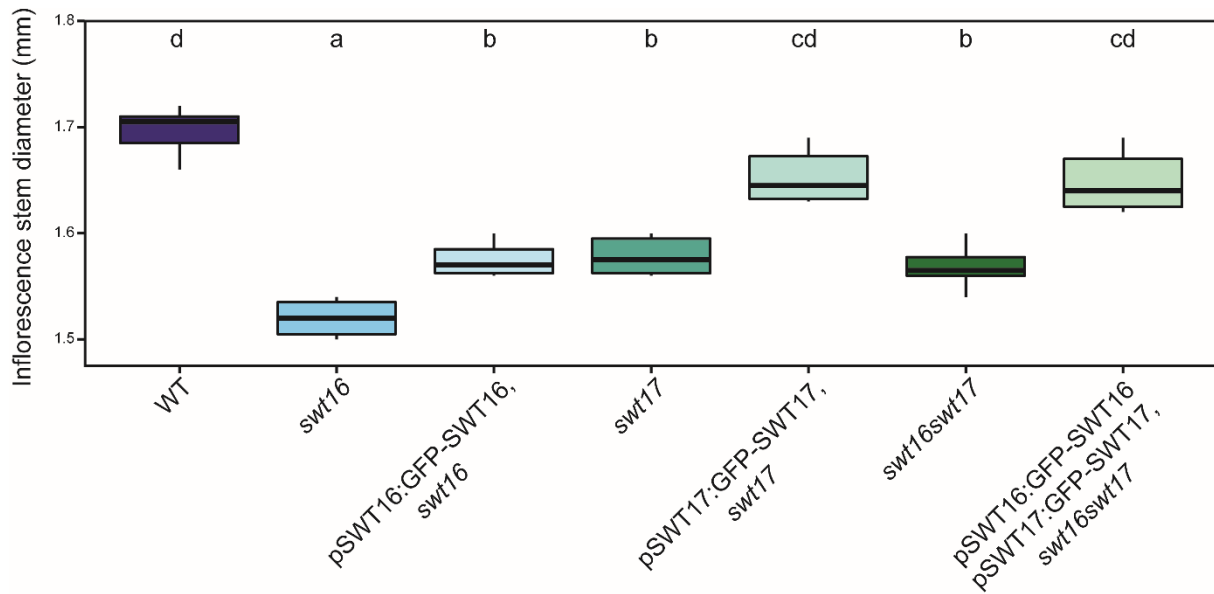

1227

1228

1229 **Supplemental Figure 5. Checking the functionality of the translational GFP fusions by**  
1230 **complementation of the inflorescence stem phenotype of the single and double mutants.**

1231 The diameter was measured with a digital caliper at the bottom of the main inflorescence stem  
1232 on plants grown for 7 weeks in long-day conditions. The lines represent median values, the tops  
1233 and bottoms of the boxes represent the first and third quartiles respectively, and the ends of the  
1234 whiskers represent maximum and minimum data points. Values represent means from six  
1235 biological replicates. A one-way analysis of variance combined with the Tukey's comparison  
1236 post-hoc test were performed. Values marked with the same letter were not significantly  
1237 different from each other, whereas different letters indicate significant differences ( $P < 0.05$ ).

1238

1239 **Supplemental Table 1. *p* values from pairwise comparisons (Tukey post-hoc test) between**  
 1240 **genotypes for anatomical parameters measured in the xylem tissue of the inflorescence**  
 1241 **stem. Values in grey boxes are significantly different at the 95% confidence level.**

1242

| Genotypes compared            | Stem height | Stem diameter | Total xylem area | Fiber area | Vessel area | Total xylem number | Fiber number | Vessel number | Ratio vessels/fibers |
|-------------------------------|-------------|---------------|------------------|------------|-------------|--------------------|--------------|---------------|----------------------|
| WT - <i>s11</i>               | 0.999       | 0.012         | 0.001            | 0.686      | 0.882       | <0.001             | 0.002        | 0.001         | 0.887                |
| WT - <i>s12</i>               | 0.999       | 0.681         | 0.302            | 0.999      | 0.999       | 0.620              | 0.853        | 0.119         | 0.887                |
| WT - <i>s11s12</i>            | 0.556       | <0.001        | <0.001           | 1          | 0.815       | <0.001             | <0.001       | <0.001        | 0.766                |
| WT - <i>s16</i>               | 1           | 0.04          | 0.05             | 0.864      | 0.994       | <0.001             | <0.001       | 0.350         | 1                    |
| WT - <i>s17</i>               | 0.930       | 0.055         | 0.999            | 0.538      | 0.875       | 0.909              | 0.786        | 0.999         | 0.998                |
| WT - <i>s16s17</i>            | 0.999       | 0.002         | 0.036            | 1          | 0.999       | 0.031              | 0.074        | 0.026         | 0.904                |
| WT - <i>qua</i>               | 0.068       | <0.001        | <0.001           | 0.815      | 0.930       | <0.001             | <0.001       | <0.001        | 0.999                |
| <i>s11</i> - <i>s12</i>       | 0.999       | 0.576         | 0.668            | 0.582      | 0.989       | 0.294              | 0.267        | 0.889         | 1                    |
| <i>s11</i> - <i>s16</i>       | 0.999       | 0.999         | 0.926            | 0.999      | 0.999       | 0.999              | 0.999        | 0.539         | 0.926                |
| <i>s11</i> - <i>s17</i>       | 0.997       | 0.996         | 0.001            | 0.999      | 1           | <0.001             | <0.001       | 0.015         | 0.998                |
| <i>s12</i> - <i>s16</i>       | 0.999       | 0.407         | 0.999            | 0.769      | 0.999       | 0.349              | 0.119        | 0.999         | 0.929                |
| <i>s12</i> - <i>s17</i>       | 0.916       | 0.910         | 0.191            | 0.446      | 0.988       | 0.112              | 0.143        | 0.360         | 0.999                |
| <i>s11s12</i> - <i>s11</i>    | 0.870       | <0.001        | 0.842            | 0.771      | 1           | 0.511              | 0.349        | 0.999         | 0.999                |
| <i>s11s12</i> - <i>s12</i>    | 0.559       | <0.001        | 0.027            | 0.999      | 0.978       | <0.001             | <0.001       | 0.713         | 0.999                |
| <i>s11s12</i> - <i>s16</i>    | 0.628       | <0.001        | 0.104            | 0.913      | 0.997       | 0.277              | 0.389        | 0.306         | 0.838                |
| <i>s11s12</i> - <i>s17</i>    | 0.994       | <0.001        | <0.001           | 0.645      | 1           | <0.001             | <0.001       | 0.004         | 0.992                |
| <i>s11s12</i> - <i>s16s17</i> | 0.512       | <0.001        | 0.163            | 1          | 0.981       | 0.027              | 0.013        | 0.909         | 0.999                |
| <i>s11s12</i> - <i>qua</i>    | 0.974       | 0.999         | 0.998            | 0.891      | 0.999       | 0.999              | 0.998        | 0.999         | 0.737                |
| <i>s16s17</i> - <i>s11</i>    | 0.999       | 0.999         | 0.965            | 0.746      | 0.991       | 0.941              | 0.952        | 0.982         | 0.999                |
| <i>s16s17</i> - <i>s12</i>    | 1           | 0.316         | 0.996            | 0.999      | 1           | 0.923              | 0.890        | 0.999         | 1                    |
| <i>s16s17</i> - <i>s16</i>    | 0.999       | 0.999         | 0.999            | 0.899      | 0.999       | 0.976              | 0.852        | 0.970         | 0.941                |
| <i>s16s17</i> - <i>s17</i>    | 0.899       | 0.951         | 0.025            | 0.614      | 0.990       | 0.002              | 0.002        | 0.143         | 0.999                |
| <i>s16s17</i> - <i>qua</i>    | 0.064       | <0.001        | 0.029            | 0.878      | 0.997       | 0.003              | 0.001        | 0.795         | 0.876                |
| <i>qua</i> - <i>s11</i>       | 0.270       | <0.001        | 0.468            | 0.082      | 0.999       | 0.188              | 0.095        | 0.999         | 0.856                |
| <i>qua</i> - <i>s12</i>       | 0.087       | <0.001        | 0.003            | 0.968      | 0.996       | <0.001             | <0.001       | 0.544         | 0.858                |
| <i>qua</i> - <i>s16</i>       | 0.098       | <0.001        | 0.015            | 0.142      | 0.999       | 0.067              | 0.102        | 0.178         | 0.999                |
| <i>qua</i> - <i>s17</i>       | 0.613       | <0.001        | <0.001           | 0.047      | 0.999       | 0                  | 0            | 0.001         | 0.994                |

1243

1244

1245 **Supplemental Table 2. Genes co-regulated during secondary cell wall formation.**

1246 Genes related to secondary cell wall formation and sugar transport were selected from  
1247 differentially expressed genes associated with Cluster 21, as identified in Supplemental Table  
1248 S7 in Li et al. (2016).

1249

| <b>AGI</b> | <b>Name</b> | <b>Biological process</b>          |
|------------|-------------|------------------------------------|
| AT1G43790  | TED6        | Cellulose biosynthesis/assembly    |
| AT3G16920  | CTL2        | Cellulose biosynthesis/assembly    |
| AT4G18780  | CesA8       | Cellulose biosynthesis/assembly    |
| AT5G03170  | AtFLA11     | Cellulose biosynthesis/assembly    |
| AT5G17420  | CesA7       | Cellulose biosynthesis/assembly    |
| AT5G44030  | CesA4       | Cellulose biosynthesis/assembly    |
| AT1G28470  | SND3        | Transcriptional regulation         |
| AT1G62990  | IRX11       | Transcriptional regulation         |
| AT1G63910  | MYB103      | Transcriptional regulation         |
| AT1G66230  | MYB20       | Transcriptional regulation         |
| AT2G45420  | LBD18       | Transcriptional regulation         |
| AT4G00220  | LBD30       | Transcriptional regulation         |
| AT4G12350  | MYB42       | Transcriptional regulation         |
| AT4G22680  | MYB85       | Transcriptional regulation         |
| AT4G28500  | SND2        | Transcriptional regulation         |
| AT5G12870  | MYB46       | Transcriptional regulation         |
| AT1G19300  | PARVUS      | Xylan biosynthesis                 |
| AT1G27440  | IRX10/GUT2  | Xylan biosynthesis                 |
| AT2G28110  | FRA8        | Xylan biosynthesis                 |
| AT2G37090  | IRX9        | Xylan biosynthesis                 |
| AT3G18660  | GUX1        | Xylan biosynthesis                 |
| AT3G50220  | IRX15       | Xylan biosynthesis                 |
| AT4G33330  | GUX2        | Xylan biosynthesis                 |
| AT5G46340  | RWA1        | Xylan biosynthesis                 |
| AT5G54690  | IRX8        | Xylan biosynthesis                 |
| AT5G67210  | IRX15L      | Xylan biosynthesis                 |
| AT4G15920  | SWEET17     | Fructose transport                 |
| AT3G14770  | SWEET2      | Glucose transport                  |
| AT1G08920  | ESL1        | Hexose transport                   |
| AT1G11260  | STP1        | Hexose/H <sup>+</sup> co-transport |
| AT5G26340  | STP13       | Hexose/H <sup>+</sup> co-transport |
| AT2G20780  | PMT4        | Polyol/monosaccharide transport    |

1250

1251

1252

1253

1254 **Supplemental Table 3. *p* values from *t*-test of metabolites identified from GC-MS analysis.**

1255 Values in red boxes are significantly different at the 95% confidence level. Metabolites are  
 1256 organized in classes according to the Golm metabolome database ([http://gmd.mpimp-](http://gmd.mpimp-golm.mpg.de/Metabolites/List.aspx)  
 1257 [golm.mpg.de/Metabolites/List.aspx](http://gmd.mpimp-golm.mpg.de/Metabolites/List.aspx)).

1258

| Metabolite                     | <i>p</i> value | Class                         |
|--------------------------------|----------------|-------------------------------|
| aspartic acid 1                | 0.410          | Acid (Amino)                  |
| aspartic acid 2                | 0.101          | Acid (Amino)                  |
| Beta- alanine 1                | 0.678          | Acid (Amino)                  |
| DL-3-aminoisobutyric acid 2    | 0.893          | Acid (Amino)                  |
| DL-isoleucine 1                | 0.580          | Acid (Amino)                  |
| DL-isoleucine 2                | 0.345          | Acid (Amino)                  |
| gamma-aminobutyric acid (GABA) | 0.344          | Acid (Amino)                  |
| glycine                        | 0.550          | Acid (Amino)                  |
| L-alanine 2                    | 0.553          | Acid (Amino)                  |
| L-allothreonine 2              | 0.047          | Acid (Amino)                  |
| L-asparagine 2                 | 0.115          | Acid (Amino)                  |
| L-glutamic acid 2              | 0.066          | Acid (Amino)                  |
| L-glutamic acid 3 (dehydrated) | 0.602          | Acid (Amino)                  |
| L-glutamine 1                  | 0.941          | Acid (Amino)                  |
| L-glutamine 2                  | 0.224          | Acid (Amino)                  |
| L-glutamine 3                  | 0.106          | Acid (Amino)                  |
| L-leucine 2                    | 0.547          | Acid (Amino)                  |
| L-lysine 2                     | 0.372          | Acid (Amino)                  |
| L-ornithine 2                  | 0.178          | Acid (Amino)                  |
| L-proline 2                    | 0.283          | Acid (Amino)                  |
| L-serine 1                     | 0.096          | Acid (Amino)                  |
| L-serine 2                     | 0.066          | Acid (Amino)                  |
| L-threonine 1                  | 0.415          | Acid (Amino)                  |
| L-threonine 2                  | 0.232          | Acid (Amino)                  |
| L-tryptophan 2                 | 0.497          | Acid (Amino)                  |
| L-valine 2                     | 0.047          | Acid (Amino)                  |
| norvaline 1 (pmm)              | 0.973          | Acid (Amino)                  |
| Phenylalanine 1                | 0.162          | Acid (Amino)                  |
| Phenylalanine 1                | 0.124          | Acid (Amino)                  |
| tyrosine 2                     | 0.319          | Acid (Amino)                  |
| citrulline 2                   | 0.200          | Acid (Amino). non proteinogen |
| acetyl-L-serine 1              | 0.153          | Acid (Amino. N-acyl-)         |

| Metabolite            | <i>p</i> value | Class                                  |
|-----------------------|----------------|----------------------------------------|
| 4-hydroxybenzoic acid | 0.634          | Acid (Aromatic)                        |
| benzoic acid (pmm)    | 0.027          | Acid (Aromatic)                        |
| mandelic acid         | 0.552          | Acid (Aromatic)                        |
| salicylic acid        | 0.955          | Acid (Aromatic)                        |
| glycolic acid (sl)    | 0.931          | Acid (carboxy)                         |
| glyoxylic acid        | 0.736          | Acid (carboxy)                         |
| adipic acid           | 0.222          | Acid (Dicarboxylic)                    |
| azelaic acid          | 0.352          | Acid (Dicarboxylic)                    |
| citraconic acid 1     | 0.008          | Acid (Dicarboxylic)                    |
| citraconic acid 3     | 0.857          | Acid (Dicarboxylic)                    |
| citraconic acid 5     | 0.763          | Acid (Dicarboxylic)                    |
| fumaric acid          | 0.039          | Acid (Dicarboxylic)                    |
| glutaconic acid 1     | 0.158          | Acid (dicarboxylic)                    |
| glutaric acid (pmm)   | 0.662          | Acid (Dicarboxylic)                    |
| itaconic acid         | 0.114          | Acid (Dicarboxylic)                    |
| maleic acid           | 0.556          | Acid (Dicarboxylic)                    |
| malonic acid 1        | 0.143          | Acid (Dicarboxylic)                    |
| oxalic acid           | 0.668          | Acid (Dicarboxylic)                    |
| succinic acid         | 0.548          | Acid (Dicarboxylic)                    |
| arachidic acid        | 0.779          | Acid (Fatty acid trimethylsilyl ester) |
| capric acid           | 0.698          | Acid (Fatty acid trimethylsilyl ester) |
| elaidic acid          | 0.787          | Acid (Fatty acid trimethylsilyl ester) |
| lauric acid           | 0.505          | Acid (Fatty acid trimethylsilyl ester) |

| Metabolite                        | p value | Class                                  |
|-----------------------------------|---------|----------------------------------------|
| linoleic acid                     | 0.711   | Acid (Fatty acid trimethylsilyl ester) |
| myristic acid                     | 0.253   | Acid (Fatty acid trimethylsilyl ester) |
| Myristic Acid d27                 | 0.387   | Acid (Fatty acid trimethylsilyl ester) |
| oleic acid                        | 0.956   | Acid (Fatty acid trimethylsilyl ester) |
| palmitic acid                     | 0.609   | Acid (Fatty acid trimethylsilyl ester) |
| palmitoleic acid                  | 0.544   | Acid (Fatty acid trimethylsilyl ester) |
| stearic acid                      | 0.569   | Acid (Fatty acid trimethylsilyl ester) |
| hexanoic acid (sl)                | 0.277   | Acid (Fatty acid)                      |
| D-saccharic acid                  | 0.625   | Acid (Hexaric)                         |
| galactonic acid 2                 | 0.717   | Acid (Hexonic)                         |
| gluconic acid 2                   | 0.669   | Acid (Hexonic)                         |
| gluconic acid lactone 1           | 0.249   | Acid (Hexonic. lactone)                |
| galacturonic acid 1               | 0.302   | Acid (Hexuronic)                       |
| citramalic acid                   | 0.460   | Acid (hydroxy ducarboxy)               |
| dehydroascorbic acid 1            | 0.525   | Acid (Hydroxy)                         |
| dehydroascorbic acid 4            | 0.728   | Acid (Hydroxy)                         |
| D-malic acid                      | 0.795   | Acid (Hydroxy)                         |
| glyceric acid                     | 0.731   | Acid (Hydroxy)                         |
| L-(+) lactic acid (sl)            | 0.562   | Acid (Hydroxy)                         |
| L-ascorbic acid                   | 0.162   | Acid (Hydroxy)                         |
| pantothenic acid 2                | 0.784   | Acid (Hydroxy)                         |
| quinic acid                       | 0.195   | Acid (Hydroxy)                         |
| shikimic acid                     | 0.744   | Acid (Hydroxy)                         |
| tagatose 1                        | 0.051   | Acid (Hydroxy)                         |
| threonic acid                     | 0.535   | Acid (Hydroxy)                         |
| erythrono-1.4-lactone             | 0.915   | Acid (Hydroxy. lactone)                |
| alpha ketoglutaric acid           | 0.114   | acid (Keto)                            |
| nicotinic acid                    | 0.308   | Acid (N-heterocycle)                   |
| B28pyruvic acid (sl)              | 0.940   | Acid (Oxo)                             |
| 3.5-dimethoxy-4-hydroxycinnamique | 0.322   | Acid (Phenylpropanoic)                 |

| Metabolite                     | p value | Class                         |
|--------------------------------|---------|-------------------------------|
| cinnamic acid                  | 0.847   | Acid (Phenylpropanoic)        |
| ferulic acid                   | 0.943   | Acid (Phenylpropanoic)        |
| phosphoric acid                | 0.059   | Acid (Phosphate)              |
| citric acid                    | 0.421   | Acid (Tricarboxylic)          |
| isocitric acid                 | 0.343   | Acid (Tricarboxylic)          |
| trans-aconitic acid            | 0.282   | Acid (Tricarboxylic)          |
| 1-decanol (decyl alcohol)      | 0.114   | <b>Alcohol</b>                |
| 1-nonanol                      | 0.490   | <b>Alcohol</b>                |
| ethanolamine                   | 0.741   | Alcohol (Amino)               |
| triethanolamine                | 0.560   | Alcohol (Amino)               |
| phytol 2                       | 0.041   | Alcohol (Isoprenoid)          |
| beta-glycerolphosphate         | 0.540   | Alcohol (Phosphate)           |
| glycerol 1-phosphate           | 0.305   | Alcohol (Phosphate)           |
| urea                           | 0.093   | Amide                         |
| allantoin 1                    | 0.100   | Amide (N-heterocycle)         |
| allantoin 3                    | 0.078   | Amide (N-heterocycle)         |
| putrescine                     | 0.891   | Amine (Poly)                  |
| galactinol 2                   | 0.656   | Conjugate (Hexosyl. Inositol) |
| galactitol                     | 0.910   | Conjugate (Hexosyl. Inositol) |
| 2.3-butanediol 2               | 0.157   | misc                          |
| 2-hydroxypyridine              | 0.942   | misc                          |
| 3-(methylthio)-propylamine     | 0.449   | misc                          |
| 3-indoleacetoneitrile          | 0.225   | misc                          |
| 4-hydroxypyridine              | 0.369   | misc                          |
| acetohydroxamic acid           | 0.930   | misc                          |
| benzothiazole                  | 0.496   | misc                          |
| cyclohexanamine                | 0.890   | misc                          |
| cysteinylglycine 1             | 0.040   | misc                          |
| homovanillic acid (HVA)        | 0.839   | misc                          |
| isopropyl beta-D-1-thiogalacto | 0.728   | misc                          |
| loganin                        | 0.357   | misc                          |
| neohesperidin                  | 0.222   | misc                          |
| N-ethylglycine 2               | 0.824   | misc                          |
| N-methylalanine                | 0.317   | misc                          |

| Metabolite               | p value | Class                             |
|--------------------------|---------|-----------------------------------|
| O-phosphocolamine        | 0.158   | misc                              |
| porphine 1               | 0.736   | misc                              |
| tyramine                 | 0.691   | misc                              |
| adenosine 5'-diphosphate | 0.589   | Nucleoside                        |
| D-sorbitol               | 0.539   | Polyol (Hexitol)                  |
| myo-inositol             | 0.171   | Polyol (Inositol)                 |
| glycerol                 | 0.444   | Polyol (Triol)                    |
| adenine 1                | 0.357   | Purine                            |
| uric acid 1              | 0.711   | Purine                            |
| 9H-purine-6-amine        | 0.133   | purine (cytokinine)               |
| beta-gentiobiose 2       | 0.481   | Sugar (Disaccharide)              |
| lactose 1                | 0.461   | Sugar (Disaccharide)              |
| leucrose                 | 0.386   | Sugar (Disaccharide)              |
| maltose 2                | 0.716   | Sugar (Disaccharide)              |
| melibiose 1              | 0.846   | Sugar (Disaccharide)              |
| Sucrose                  | 0.995   | Sugar (Disaccharide)              |
| fructose 1               | 0.071   | Sugar (Hexose)                    |
| fructose 2               | 0.009   | Sugar (Hexose)                    |
| D (+)altrose 1           | 0.336   | Sugar (Hexose. aldose)            |
| D-(+) trehalose          | 0.073   | Sugar (Hexose. aldose)            |
| D-glucose 1              | 0.200   | Sugar (Hexose. aldose)            |
| D-glucose 2              | 0.325   | Sugar (Hexose. aldose)            |
| D-mannose 1              | 0.383   | Sugar (Hexose. aldose)            |
| Glucopyranose            | 0.285   | Sugar (Hexose. aldose)            |
| 1.5-anhydro-D-sorbitol   | 0.303   | Sugar (Hexose. aldose. anhydride) |
| 1.6-anhydro-glucose      | 0.435   | Sugar (Hexose. aldose. anhydride) |
| rhamnose 1               | 0.339   | Sugar (Hexose. deoxy)             |
| rhamnose 2               | 0.330   | Sugar (Hexose. deoxy)             |
| arabinose                | 0.639   | Sugar (Pentose. aldose)           |
| ribose                   | 0.524   | Sugar (Pentose. aldose)           |

| Metabolite                | p value | Class                       |
|---------------------------|---------|-----------------------------|
| xylose 2                  | 0.591   | Sugar (Pentose. aldose)     |
| xylulose                  | 0.773   | Sugar (Pentose. ketose)     |
| D-glucose-6-phosphate 1   | 0.126   | Sugar (Phosphate)           |
| D-glucose-6-phosphate 2   | 0.040   | Sugar (Phosphate)           |
| fructose 6-phosphate      | 0.104   | Sugar (Phosphate)           |
| sedoheptulose 7-phosphate | 0.221   | Sugar (Phosphate)           |
| Raffinose (pmm)           | 0.931   | Sugar (Trisaccharide)       |
| beta-sitosterol           | 0.212   | Terpenoid ( <b>Sterol</b> ) |
| cholesterol               | 0.816   | Terpenoid ( <b>Sterol</b> ) |



## Supplemental Table 4. Primers used for characterizing mutant lines and for cloning purposes

| Accession number | Primer name      | Sequence (5'→3')                          | Amplicon size (bp) | Purpose             |
|------------------|------------------|-------------------------------------------|--------------------|---------------------|
| At3g16690        | sweet16-3_LP     | TGCAACTATGGAATGGAAGG                      | 1655               | Genotyping          |
|                  | sweet16-3_RP     | GATTCAGCAAGAGCACCAAAG                     |                    |                     |
|                  | sweet16-4_LP     | TGCAAATAATTTAGCAACCGC                     | 1742               |                     |
|                  | sweet16-4_RP     | TATAAATGATCTGGGGCCATC                     |                    |                     |
|                  | SWEET16ATG-stopF | ATGGCAGACTTGAGTTTTTATGTC                  | 693                | Full-length PCR     |
|                  | SWEET16ATG-stopR | TTAAGCGAGGAGAGGTTGATTT                    |                    |                     |
|                  | Bam-pS16-5'      | CGGGATCCTGATTACAACATTACAACATTCAGTG        | 1295               | Cloning GFP fusions |
|                  | Eco1-pS16-3'     | CGGAATTCCTCTGAGGATGGGTTTCTGAG             |                    |                     |
|                  | Not-S16-5'       | ATAAGAATGCGGCCGCATGGCAGACTTGAGTTTTTATG    | 1863               |                     |
|                  | Eco5-S16-3'      | ATAAGAATGCGGCCGCCATGGCAGACTTGAGTTTTTATGT  |                    |                     |
| At4g15920        | sweet17-1_LP     | TGATGTGAGGCCCTTCCTCTT                     | 771                | Genotyping          |
|                  | sweet17-1_RP     | CCGTTTTGTTGTCGTTTTT                       |                    |                     |
|                  | Sal-pS17-5'      | ACGCGTCGACAAAGAGATAAAATTAATGAGATTTGTATGG  | 2004               | Cloning GFP fusions |
|                  | Kpn-pS17-3'      | GGGGTACCTATTGGAGAAAAGATTTCTGAG            |                    |                     |
|                  | NotI-S17-5'      | ATAAGAATGCGGCCGCCATGGCAGAGGCAAGTTTCTATATC | 2601               |                     |
|                  | Eco5-S17-3'      | CCCGGATATCTTAAGAGAGGAGAGGTTCAACACG        |                    |                     |
| eGFP             | Eco1-eGFP5'      | CGGAATTCATGGTGAGCAAGGGCGAGGA              | 714                | Cloning             |
|                  | Not-eGFP-3'ostop | ATAAGAATGCGGCCGCTTGTACAGCTCGTCCATGCC      |                    |                     |

### Supplemental Table 5. Primers used for quantifying gene expression by qPCR

| Accession number | Gene name             | Forward sequence (5'→3')   | Reverse sequence (5'→3')           | Size (bp) | Efficiency | Reference                  |
|------------------|-----------------------|----------------------------|------------------------------------|-----------|------------|----------------------------|
| At5g12870        | <i>MYB46</i>          | GAATGTGAAGAAGGTGATTGGTACA  | CGAAGGAACCTCAGTGTTCATCA            | 150       | 73.5       | (Takeuchi et al., 2018)    |
| At3g08500        | <i>MYB83</i>          | GTCGCCTTCGCTGGATCAAT       | AAGCCGCTTCTTCAATGTCG               | 191       | 85.8       | (Shafi et al., 2019)       |
| At5g61480        | <i>PXY</i>            | TTCAAACCGACGAATCCATGT      | TTATCCACTTGTAAGTGTAAAGCATATT<br>CT | 85        | 95.4       | (Smetana et al., 2019)     |
| At1g46480        | <i>WOX4</i>           | GACAAGAACATCATCGTCACTAGACA | TTCTCCACCATTGGTTCTCTCA             | 51        | 92.4       | (Smetana et al., 2019)     |
| At1g32770        | <i>SND1/<br/>NST3</i> | GCAGCAACTGGGCTAGTCTT       | CCCATCGCTGCATCATAGTA               | 126       | 93.6       | This study                 |
| At4g32880        | <i>AtHB8</i>          | AACACCACTTGACCCTCAACATCAG  | CACGCAACCAACAAGGCTTATCC            | 276       | 91.9       | (Carlsbecker et al., 2010) |
| At5g44030        | <i>CESA4</i>          | TGCCTATGGATCGGAAAATGGA     | ACGTTCTTCCACTCCGCAT                | 145       | 95.4       | (Shafi et al., 2019)       |
| At5g17420        | <i>CESA7</i>          | TTGTGTACGTGTCCCGTGAG       | ATTTGTGAGTACGCCTGCCA               | 98        | 101.1      | (Shafi et al., 2019)       |
| At4g18780        | <i>CESA8</i>          | AGGTCTCCCATCTGCAACAC       | CTCATCGTAAGGATTGCCGC               | 168       | 97.9       | (Shafi et al., 2019)       |
| At1g28470        | <i>SND3</i>           | TTCTTCCACCGCCATCAAA        | CTGGCGACCATAGTTGGTGT               | 183       | 103.8      | (Shafi et al., 2019)       |
| At1g63910        | <i>MYB103</i>         | GGGAAACAGGTGGGCTCATA       | TGGTAGAGGCTCGATGGTA                | 197       | 100.3      | (Shafi et al., 2019)       |
| At1g62990        | <i>KNAT7</i>          | GAAGCTGTATGGCTTGCCG        | TCGGTAGCAACGGACCAAAT               | 190       | 95.3       | (Shafi et al., 2019)       |
| At1g79180        | <i>MYB63</i>          | GACAAACCGATCTGCTGGA        | CCCAGTTCGCTTTCTAGGT                | 189       | 99.8       | (Shafi et al., 2019)       |
| At1g16490        | <i>MYB58</i>          | AAGCGGGTTCAAAGGTTCT        | GCATCATCGTCTTTGCTTGA               | 109       | 98         | This study                 |
| At5g13180        | <i>VNI2</i>           | CTCCTTTGCCAGCTTCAATC       | GGTTAGACCGGTTCCCATTT               | 138       | 97.8       | This study                 |
| At5g64530        | <i>XND1</i>           | CCCGACCTTGATCTTTACCA       | CCCAATACCATTGCTTGTC                | 124       | 94.9       | This study                 |
| At4g39620        | <i>MYB4</i>           | ACAGAGGGATTGATCCAACG       | TCGACCTTTGGAGCAGAAGT               | 133       | 97.9       | This study                 |
| At1g17950        | <i>MYB52</i>          | CCGGTCGAACTGATAACGCT       | ACCAATCATCCCAGTCGCAG               | 131       | 103        | (Shafi et al., 2019)       |
| At1g73410        | <i>MYB54</i>          | AACCGAAACCTTTACGGA         | ACGAGGCTTAGAGGTTTGGC               | 174       | 87.8       | (Shafi et al., 2019)       |
| At5g16600        | <i>MYB43</i>          | CCATGCGCAACTTGCAATA        | CCCTTGAGCTTGTTGTAAGC               | 178       | 100.1      | (Shafi et al., 2019)       |
| At3g62250        | <i>UBQ5</i>           | CCAAGCCGAAGAAGATCAAG       | ACTCCTTCTCAAACGCTGA                | 105       | 98.6       | This study                 |

## SUPPLEMENTAL REFERENCES

- Carlsbecker, A., Lee, J. Y., Roberts, C. J., Dettmer, J., Lehesranta, S., Zhou, J., Lindgren, O., Moreno-Risueno, M. A., Vatén, A., Thitamadee, S., et al.** (2010). Cell signalling by microRNA165/6 directs gene dose-dependent root cell fate. *Nature* **465**, 316–321.
- Chen, L.-Q., Hou, B.-H., Lalonde, S., Takanaga, H., Hartung, M. L., Qu, X.-Q., Guo, W.-J., Kim, J.-G., Underwood, W., Chaudhuri, B., et al.** (2010). Sugar transporters for intercellular exchange and nutrition of pathogens. *Nature* **468**, 527–532.
- Li, Z., Omranian, N., Neumetzler, L., wang, ting, Herter, T., Usadel, B., Demura, T., Giavalisco, P., Nikoloski, Z. and Persson, S.** (2016). A Transcriptional and Metabolic Framework for Secondary Wall Formation in Arabidopsis. *Plant Physiol.* pp.01100.2016.
- Poschet, G., Hannich, B., Raab, S., Jungkunz, I., Klemens, P. A. W., Krueger, S., Wic, S., Neuhaus, H. E. and Buttner, M.** (2011). A Novel Arabidopsis Vacuolar Glucose Exporter Is Involved in Cellular Sugar Homeostasis and Affects the Composition of Seed Storage Compounds. *Plant Physiol.* **157**, 1664–1676.
- Sellami, S., Le Hir, R., Thorpe, M. R., Vilaine, F., Wolff, N., Brini, F. and Dinant, S.** (2019). Salinity effects on sugar homeostasis and vascular anatomy in the stem of the *Arabidopsis thaliana* inflorescence. *Int. J. Mol. Sci.* **20**, 3167.
- Shafi, A., Gill, T., Zahoor, I., Ahuja, P. S., Sreenivasulu, Y., Kumar, S. and Singh, A. K.** (2019). Ectopic expression of SOD and APX genes in Arabidopsis alters metabolic pools and genes related to secondary cell wall cellulose biosynthesis and improve salt tolerance. *Mol. Biol. Rep.* **46**, 1985–2002.
- Smetana, O., Mäkilä, R., Lyu, M., Amiryousefi, A., Rodríguez, F. S., Wu, M., Solé-gil, A., Gavarrón, M. L., Siligato, R., Miyashima, S., et al.** (2019). High levels of auxin signalling define the stem-cell organizer of the vascular cambium. *Nature* **565**, 485–491.
- Takeuchi, M., Watanabe, A., Tamura, M. and Tsutsumi, Y.** (2018). The gene expression analysis of Arabidopsis thaliana ABC transporters by real-time PCR for screening monolignol-transporter candidates. *J. Wood Sci.* **64**, 477–484.
